# Supplementary material for: Racial Inequalities in Adolescents' Exposure to Racial and Socioeconomic Segregation, Collective Efficacy, and Violence
Source: Oxford University Press journal article supplement (doi:10.1215/00703370-10210688), 2022-09-12
Supplement: pinchak_esm.pdf [file pinchak_esm.pdf]

## **APPENDIX to:**

"Racial Inequalities in Adolescents' Exposure to Racial and Socioeconomic Segregation, Collective Efficacy, and Violence"

by Nicolo P. Pinchak, Christopher R. Browning, Catherine A. Calder, and Bethany Boettner

# **Appendix**

## **Sample Information and Supplemental Figure**

Appendix Table 1. Comparison of Adolescent Health and Development in Context Sample Characteristics to Estimated Population of Youth and Households

Appendix Figure 1. Distribution of home neighborhood concentrated disadvantage by race for the full sample of Black and white AHDC youth.

Appendix Figure 2. Distribution of home neighborhood concentrated disadvantage by race for the census tract fixed effects sample of Black and white AHDC youth.

Appendix Figure 3. The effect of respondent Black (vs. white) race on non-home exposure to proportion Black and  $\ln(\text{violent crime})$  in their original metrics.

## **Full Tables for Models Presented in Table 2**

Appendix Table 2. Linear regression models for non-home exposure to concentrated disadvantage with cluster robust standard errors.

Appendix Table 3. Linear regression models for non-home exposure to proportion Black with cluster robust standard errors.

Appendix Table 4. Linear regression models for non-home exposure to collective efficacy with cluster robust standard errors.

Appendix Table 5. Linear regression models for non-home exposure to violent crime with cluster robust standard errors.

## **Full Tables for Interaction Models Presented in Table 3**

Appendix Table 6. Linear regression models for non-home exposure to concentrated disadvantage with cluster robust standard errors and interactions.

Appendix Table 7. Linear regression models for non-home exposure to proportion Black with cluster robust standard errors and interactions.

Appendix Table 8. Linear regression models for non-home exposure to collective efficacy with cluster robust standard errors and interactions.

Appendix Table 9. Linear regression models for non-home exposure to violent crime with cluster robust standard errors and interactions.

## **Full Tables for Interaction Models Presented in Table 3: Non-Home Exposures Excluding School Time**

Appendix Table 10. Linear regression models for non-home exposures with cluster robust standard errors, excluding school-time.

Appendix Table 11. Linear regression models for non-home exposure to concentrated disadvantage with cluster robust standard errors and interactions, excluding school-time.

Appendix Table 12. Linear regression models for non-home exposure to proportion Black with cluster robust standard errors and interactions, excluding school-time.

Appendix Table 13. Linear regression models for non-home exposure to collective efficacy with cluster robust standard errors and interactions, excluding school-time.

Appendix Table 14. Linear regression models for non-home exposure to violent crime with cluster robust standard errors and interactions, excluding school-time.

## APPENDIX: RACIAL SEGREGATION IN ACTIVITY SPACE

### **Full Tables for Models Presented in Table 2: Non-Home Exposure to Census Tract Features**

Appendix Table 15. Linear regression models for non-home exposures based on census tracts with cluster robust standard errors.

Appendix Table 16. Linear regression models for non-home exposure to concentrated disadvantage based on census tracts with cluster robust standard errors and interactions.

Appendix Table 17. Linear regression models for non-home exposure to proportion Black based on census tracts with cluster robust standard errors and interactions.

Appendix Table 18. Linear regression models for non-home exposure to collective efficacy based on census tracts with cluster robust standard errors and interactions.

### **Full Tables for Non-home Collective Efficacy Models Presented in Tables 2 and 3: Measuring Collective Efficacy with Only Home Neighborhood Reports**

Appendix Table 19. Linear regression models for non-home collective efficacy, measuring collective efficacy with home neighborhood reports.

## Sample Information and Supplemental Figure

Appendix Table 1. Comparison of Adolescent Health and Development in Context Sample Characteristics to Estimated Population of Youth and Households

| <b>Youth<br/>Race/Ethnicity</b> | <b>Population Estimate</b> | <b>AHDC Sample</b> |
|---------------------------------|----------------------------|--------------------|
| Non-Hispanic White              | 48.90%                     | 47.60%             |
| Non-Hispanic Black              | 31.90%                     | 37.90%             |
| Hispanic (any race)             | 8.70%                      | 5.40%              |
| Asian                           | 2.20%                      | 1.50%              |
| Multiracial                     | 7.90%                      | 8.40%              |
| Other                           | 0.40%                      | 0.10%              |
|                                 |                            |                    |
| <b>Household Income</b>         | <b>Population Estimate</b> | <b>AHDC Sample</b> |
| \$10,000 or below               | 13.00%                     | 13.50%             |
| \$10,001 - \$20,000             | 12.10%                     | 11.00%             |
| \$20,001 - \$30,000             | 10.30%                     | 11.80%             |
| \$30,001 - \$40,000             | 10.60%                     | 10.30%             |
| \$40,001 - \$50,000             | 7.60%                      | 7.70%              |
| \$50,001 - \$60,000             | 6.90%                      | 6.20%              |
| \$60,001 - \$100,000            | 17.80%                     | 17.00%             |
| \$100,001 - \$150,000           | 11.30%                     | 11.10%             |
| \$150,001 - \$200,000           | 5.30%                      | 5.70%              |
| Above \$200,000                 | 5.20%                      | 5.70%              |

Notes: Population estimates are derived from the American Community Survey 2012-2014 data from the IPUMS Integrated Public Use Microdata Series (Ruggles et al. 2021). We limit the ACS data to the 6 public use microdata areas (PUMAs) for which the majority of the PUMA area falls within the AHDC study area inside the beltway loop freeway I-270. PUMAs are the smallest spatial unit for which individual and household data is available. Youth racial composition is calculated for the entire population ages 11-17 living in the estimated study area, weighted at the individual level to account for sampling design of the ACS. Household income is calculated for households with at least one child age 11-17, using household level weights.

Ruggles, Steven, Sarah Flood, Sophia Foster, Ronald Goeken, Jose Pacas, Megan Schouweiler, and Matthew Sobek. 2021. *IPUMS USA: Version 11.0 [Dataset]*. Minneapolis, MN: IPUMS. <https://doi.org/10.18128/D010.V11.0>.

APPENDIX: RACIAL SEGREGATION IN ACTIVITY SPACE

Appendix Figure 1. Distribution of home neighborhood concentrated disadvantage by race for the full sample of Black and white AHDC youth.

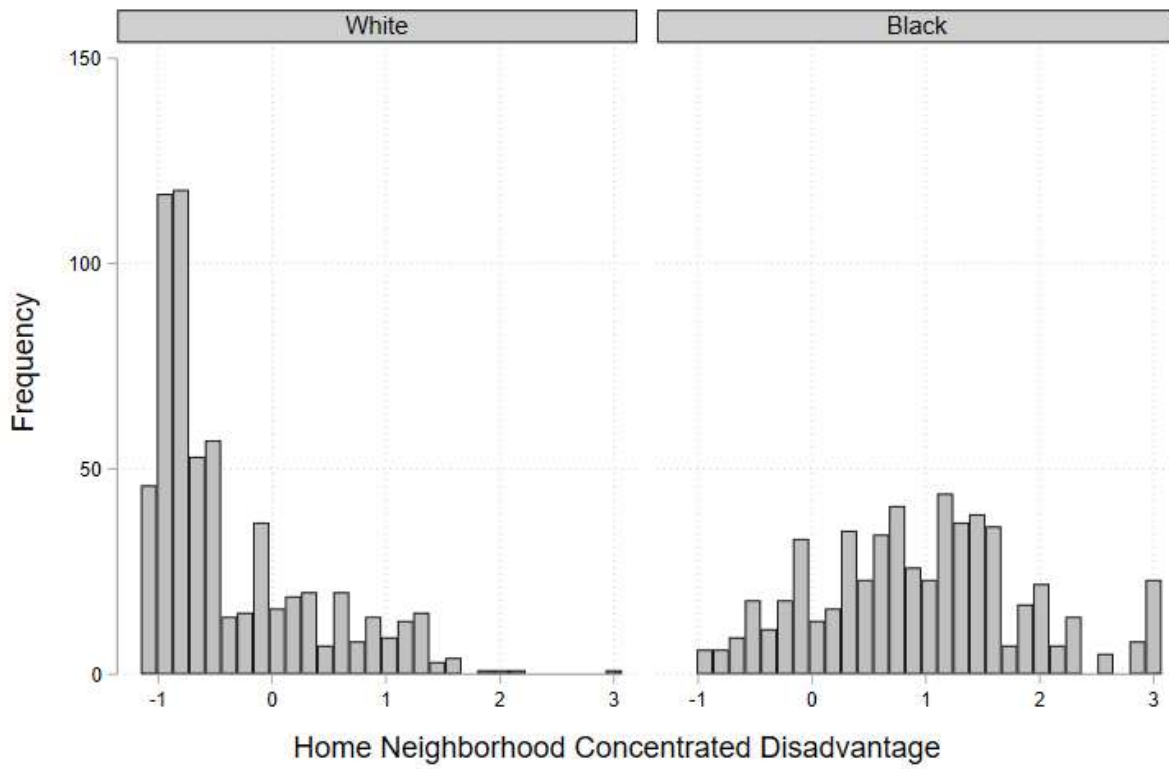

APPENDIX: RACIAL SEGREGATION IN ACTIVITY SPACE

Appendix Figure 2. Distribution of home neighborhood concentrated disadvantage by race for the census tract fixed effects sample of Black and white AHDC youth.

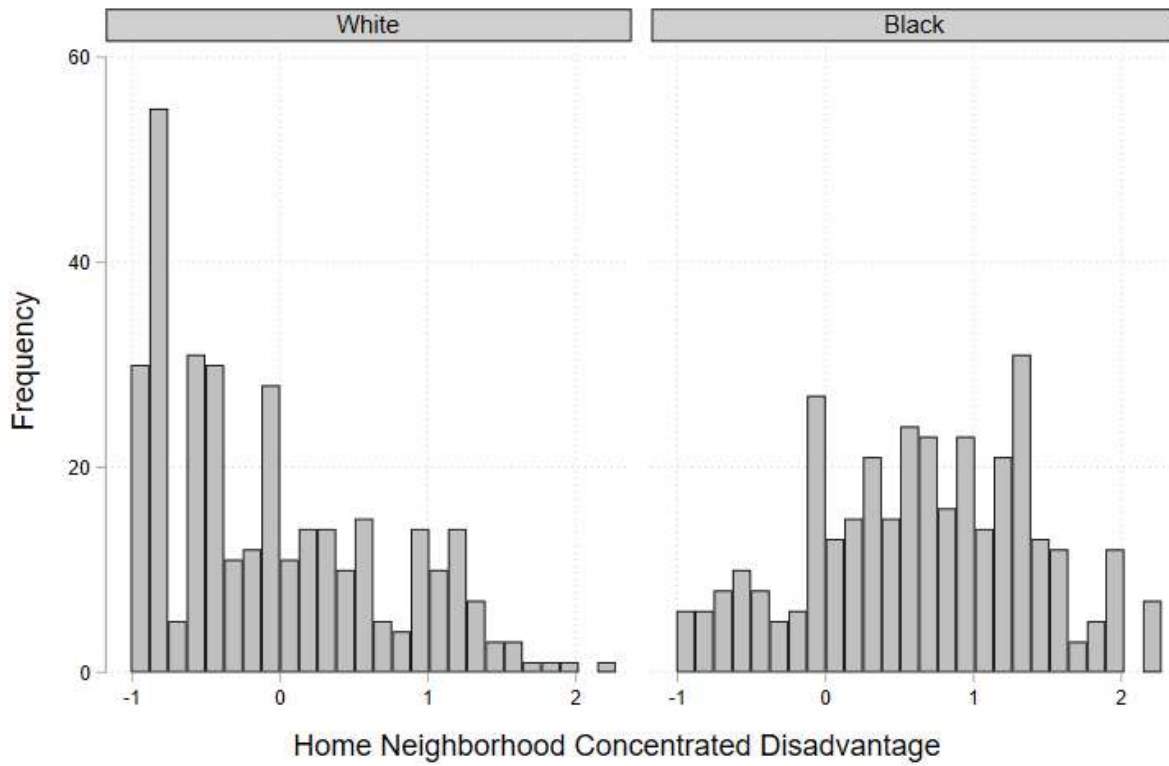

## APPENDIX: RACIAL SEGREGATION IN ACTIVITY SPACE

Appendix Figure 3. The effect of respondent Black (vs. white) race on non-home exposure to proportion Black and  $\ln(\text{violent crime})$  in their original metrics.

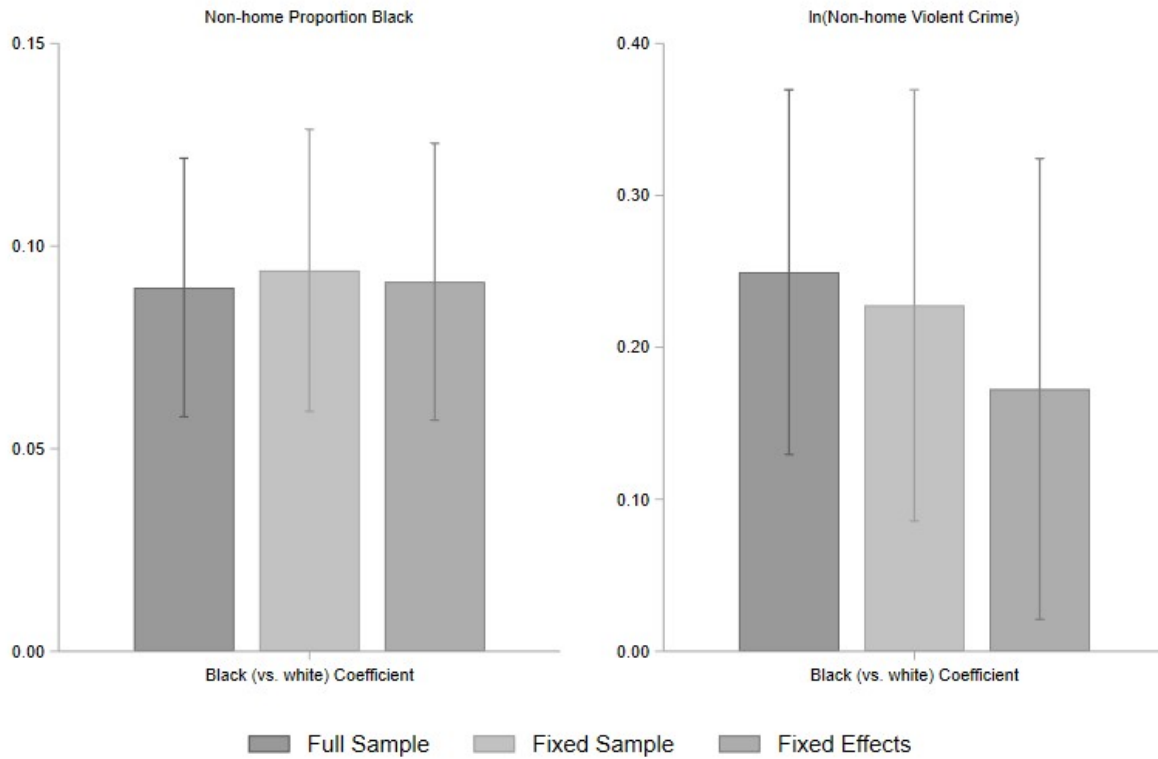

## Full Tables for Models Presented in Table 2

Appendix Table 2. Linear regression models for non-home exposure to concentrated disadvantage with cluster robust standard errors.

|                                    | Concentrated Disadvantage |                    |                     |                    |
|------------------------------------|---------------------------|--------------------|---------------------|--------------------|
|                                    | Model 1                   | Model 2            | Model 3             | Model 4            |
| ln(Block group population density) |                           | -0.044<br>(0.042)  | -0.116*<br>(0.057)  | -0.014<br>(0.074)  |
| Total non-home time (minutes)      |                           | -0.000+<br>(0.000) | -0.000**<br>(0.000) | 0.000**<br>(0.000) |
| Season                             |                           |                    |                     |                    |
| Winter (December-February) (ref.)  |                           |                    |                     |                    |
| Spring (March-May)                 |                           | 0.127+<br>(0.069)  | 0.023<br>(0.083)    | 0.068<br>(0.087)   |
| Summer (June-August)               |                           | 0.112<br>(0.073)   | 0.074<br>(0.089)    | 0.096<br>(0.089)   |
| Autumn (September-November)        |                           | 0.036<br>(0.071)   | 0.107<br>(0.087)    | 0.159+<br>(0.084)  |
| Number of Weekend Days             |                           |                    |                     |                    |
| 0                                  |                           | -0.078<br>(0.196)  | -0.112<br>(0.217)   | -0.091<br>(0.205)  |
| 1                                  |                           | -0.094<br>(0.095)  | -0.130<br>(0.132)   | -0.116<br>(0.132)  |
| 2 (ref.)                           |                           |                    |                     |                    |
| Family Controls                    |                           |                    |                     |                    |
| Household size                     |                           | 0.025<br>(0.018)   | 0.035+<br>(0.020)   | 0.030<br>(0.022)   |
| Parent male                        |                           | 0.050<br>(0.069)   | 0.019<br>(0.105)    | 0.055<br>(0.105)   |
| Parent age                         |                           | 0.001<br>(0.003)   | 0.000<br>(0.004)    | 0.002<br>(0.004)   |
| Household income                   |                           |                    |                     |                    |
| Under \$30,000 (ref.)              |                           |                    |                     |                    |
| \$30,001 - \$60,000                |                           | -0.145*<br>(0.073) | -0.128<br>(0.084)   | -0.123<br>(0.084)  |
| \$60,000 - \$150,000+              |                           | -0.210*<br>(0.082) | -0.149<br>(0.099)   | -0.076<br>(0.108)  |
| Parent education                   |                           |                    |                     |                    |
| <High school (ref.)                |                           |                    |                     |                    |
| High school                        |                           | 0.077<br>(0.130)   | 0.127<br>(0.152)    | 0.091<br>(0.146)   |
| Some college                       |                           | -0.093<br>(0.126)  | -0.012<br>(0.160)   | 0.044<br>(0.163)   |
| College degree                     |                           | -0.147<br>(0.150)  | 0.028<br>(0.195)    | 0.179<br>(0.196)   |
| Graduate degree                    |                           | -0.159             | -0.051              | 0.123              |

APPENDIX: RACIAL SEGREGATION IN ACTIVITY SPACE

|                                     |          |          |          |         |
|-------------------------------------|----------|----------|----------|---------|
|                                     |          | (0.152)  | (0.195)  | (0.202) |
| Parent marital status               |          |          |          |         |
| Married (ref.)                      |          |          |          |         |
| Cohabiting                          |          | 0.046    | 0.094    | 0.047   |
|                                     |          | (0.095)  | (0.115)  | (0.119) |
| Single                              |          | 0.137    | 0.252*   | 0.149   |
|                                     |          | (0.093)  | (0.122)  | (0.119) |
| Other                               |          | 0.048    | 0.029    | 0.039   |
|                                     |          | (0.069)  | (0.098)  | (0.103) |
| Residence owned (vs. rented)        |          | -0.081   | -0.022   | -0.112  |
|                                     |          | (0.069)  | (0.088)  | (0.086) |
| Years lived in current neighborhood |          | 0.003    | 0.005    | 0.008*  |
|                                     |          | (0.003)  | (0.003)  | (0.004) |
| Moved in the past two years         |          | 0.078    | 0.113    | 0.161   |
|                                     |          | (0.075)  | (0.095)  | (0.098) |
| Foreign born                        |          | -0.218+  | -0.287   | -0.172  |
|                                     |          | (0.116)  | (0.199)  | (0.207) |
| Age                                 | -0.016   | -0.003   | -0.006   | -0.016  |
|                                     | (0.014)  | (0.013)  | (0.016)  | (0.015) |
| Male                                | -0.078   | -0.081+  | -0.157*  | 0.159** |
|                                     | (0.053)  | (0.045)  | (0.060)  | (0.057) |
| Respondent Black (vs. white)        | 0.902*** | 0.166*   | 0.117    | 0.093   |
|                                     | (0.077)  | (0.068)  | (0.074)  | (0.084) |
| Neighborhood-level measures         |          |          |          |         |
| Tract concentrated disadvantage     |          | 0.407*** | 0.499*** |         |
|                                     |          | (0.047)  | (0.066)  |         |
| Tract proportion Black              |          |          |          |         |
| Tract collective efficacy           |          |          |          |         |
| ln(Tract Violent crime rate)        |          |          |          |         |
| Constant                            | -0.170   | 0.292    | 0.909    | 0.210   |
|                                     | (0.226)  | (0.443)  | (0.587)  | (0.743) |
| Fixed Effects                       |          |          |          | ✓       |
| N: Neighborhood-level               | 178      | 178      | 89       | 89      |
| N: Individual-level                 | 1180     | 1180     | 674      | 674     |

\*p < .05; \*\*p < .01; \*\*\*p < .001; two-tailed tests.

Notes: The following variables are z-score standardized: Tract concentrated disadvantage, tract collective efficacy, non-home concentrated disadvantage, and non-home collective efficacy.



## APPENDIX: RACIAL SEGREGATION IN ACTIVITY SPACE

Appendix Table 3. Linear regression models for non-home exposure to proportion Black with cluster robust standard errors.

|                                    | <b>Proportion Black</b> |                   |                   |                   |
|------------------------------------|-------------------------|-------------------|-------------------|-------------------|
|                                    | Model 1                 | Model 2           | Model 3           | Model 4           |
| ln(Block group population density) |                         | -0.001<br>(0.008) | 0.006<br>(0.011)  | -0.020<br>(0.013) |
| Total non-home time (minutes)      |                         | -0.000<br>(0.000) | -0.000<br>(0.000) | -0.000<br>(0.000) |
| Season                             |                         |                   |                   |                   |
| Winter (December-February) (ref.)  |                         |                   |                   |                   |
| Spring (March-May)                 |                         | 0.028*<br>(0.013) | 0.020<br>(0.020)  | 0.017<br>(0.020)  |
| Summer (June-August)               |                         | 0.017<br>(0.013)  | 0.017<br>(0.017)  | 0.020<br>(0.018)  |
| Autumn (September-November)        |                         | -0.005<br>(0.015) | -0.002<br>(0.021) | 0.009<br>(0.022)  |
| Number of Weekend Days             |                         |                   |                   |                   |
| 0                                  |                         | 0.010<br>(0.030)  | -0.026<br>(0.041) | 0.007<br>(0.049)  |
| 1                                  |                         | -0.009<br>(0.025) | -0.017<br>(0.035) | -0.022<br>(0.042) |
| 2 (ref.)                           |                         |                   |                   |                   |
| Family Controls                    |                         |                   |                   |                   |
| Household size                     |                         | 0.002<br>(0.004)  | 0.007<br>(0.005)  | 0.005<br>(0.005)  |
| Parent male                        |                         | -0.003<br>(0.012) | -0.022<br>(0.018) | -0.022<br>(0.019) |
| Parent age                         |                         | 0.001<br>(0.001)  | 0.001<br>(0.001)  | 0.001<br>(0.001)  |
| Household income                   |                         |                   |                   |                   |
| Under \$30,000 (ref.)              |                         |                   |                   |                   |
| \$30,001 - \$60,000                |                         | -0.020<br>(0.017) | -0.021<br>(0.020) | -0.017<br>(0.019) |
| \$60,000 - \$150,000+              |                         | -0.027<br>(0.018) | -0.020<br>(0.022) | -0.002<br>(0.024) |
| Parent education                   |                         |                   |                   |                   |
| <High school (ref.)                |                         |                   |                   |                   |
| High school                        |                         | -0.012<br>(0.024) | 0.018<br>(0.029)  | 0.026<br>(0.028)  |
| Some college                       |                         | -0.009<br>(0.025) | 0.013<br>(0.032)  | 0.025<br>(0.031)  |
| College degree                     |                         | -0.019<br>(0.029) | 0.018<br>(0.038)  | 0.033<br>(0.038)  |
| Graduate degree                    |                         | -0.015<br>(0.029) | 0.019<br>(0.036)  | 0.029<br>(0.037)  |
| Parent marital status              |                         |                   |                   |                   |

APPENDIX: RACIAL SEGREGATION IN ACTIVITY SPACE

|                                     |                     |                     |                     |                     |
|-------------------------------------|---------------------|---------------------|---------------------|---------------------|
| Married (ref.)                      |                     |                     |                     |                     |
| Cohabiting                          |                     | 0.010<br>(0.020)    | 0.012<br>(0.025)    | -0.001<br>(0.025)   |
| Single                              |                     | 0.044*<br>(0.019)   | 0.047+<br>(0.027)   | 0.021<br>(0.028)    |
| Other                               |                     | 0.004<br>(0.014)    | 0.001<br>(0.020)    | 0.002<br>(0.021)    |
| Residence owned (vs. rented)        |                     | -0.033*<br>(0.016)  | -0.028<br>(0.019)   | -0.042*<br>(0.020)  |
| Years lived in current neighborhood |                     | 0.001*<br>(0.001)   | 0.001+<br>(0.001)   | 0.002*<br>(0.001)   |
| Moved in the past two years         |                     | 0.034*<br>(0.014)   | 0.042*<br>(0.018)   | 0.045*<br>(0.018)   |
| Foreign born                        |                     | -0.069*<br>(0.028)  | -0.096+<br>(0.057)  | -0.065<br>(0.058)   |
| Age                                 | -0.000<br>(0.003)   | 0.000<br>(0.003)    | 0.002<br>(0.003)    | 0.002<br>(0.003)    |
| Male                                | -0.019<br>(0.012)   | -0.017+<br>(0.009)  | -0.033*<br>(0.013)  | -0.033**<br>(0.012) |
| Respondent Black (vs. white)        | 0.305***<br>(0.017) | 0.090***<br>(0.016) | 0.094***<br>(0.018) | 0.091***<br>(0.017) |
| Neighborhood-level measures         |                     |                     |                     |                     |
| Tract concentrated disadvantage     |                     | 0.019+<br>(0.012)   | -0.004<br>(0.016)   |                     |
| Tract proportion Black              |                     | 0.357***<br>(0.040) | 0.411***<br>(0.047) |                     |
| Tract collective efficacy           |                     |                     |                     |                     |
| ln(Tract Violent crime rate)        |                     |                     |                     |                     |
| Constant                            | 0.139**<br>(0.048)  | 0.082<br>(0.086)    | -0.022<br>(0.131)   | 0.321*<br>(0.136)   |
| Fixed Effects                       |                     |                     |                     | ✓                   |
| N: Neighborhood-level               | 178                 | 178                 | 89                  | 89                  |
| N: Individual-level                 | 1180                | 1180                | 674                 | 674                 |

\*p < .05; \*\*p < .01; \*\*\*p < .001; two-tailed tests.

Notes: The following variables are z-score standardized: Tract concentrated disadvantage, tract collective efficacy, non-home concentrated disadvantage, and non-home collective efficacy.

## APPENDIX: RACIAL SEGREGATION IN ACTIVITY SPACE

Appendix Table 4. Linear regression models for non-home exposure to collective efficacy with cluster robust standard errors.

|                                    | Collective Efficacy |                    |                     |                    |
|------------------------------------|---------------------|--------------------|---------------------|--------------------|
|                                    | Model 1             | Model 2            | Model 3             | Model 4            |
| ln(Block group population density) |                     | 0.057<br>(0.040)   | 0.099+<br>(0.056)   | 0.001<br>(0.069)   |
| Total non-home time (minutes)      |                     | 0.000*<br>(0.000)  | 0.000<br>(0.000)    | 0.000<br>(0.000)   |
| Season                             |                     |                    |                     |                    |
| Winter (December-February) (ref.)  |                     |                    |                     |                    |
| Spring (March-May)                 |                     | -0.095+<br>(0.054) | -0.069<br>(0.077)   | -0.096<br>(0.070)  |
| Summer (June-August)               |                     | -0.150*<br>(0.062) | -0.180*<br>(0.085)  | -0.227*<br>(0.089) |
| Autumn (September-November)        |                     | -0.062<br>(0.060)  | -0.081<br>(0.080)   | -0.117<br>(0.087)  |
| Number of Weekend Days             |                     |                    |                     |                    |
| 0                                  |                     | -0.002<br>(0.197)  | -0.103<br>(0.225)   | 0.034<br>(0.137)   |
| 1                                  |                     | 0.023<br>(0.114)   | 0.092<br>(0.125)    | -0.017<br>(0.107)  |
| 2 (ref.)                           |                     |                    |                     |                    |
| Family Controls                    |                     |                    |                     |                    |
| Household size                     |                     | -0.023<br>(0.014)  | -0.048**<br>(0.017) | -0.046*<br>(0.019) |
| Parent male                        |                     | 0.036<br>(0.059)   | 0.089<br>(0.076)    | 0.086<br>(0.082)   |
| Parent age                         |                     | 0.003<br>(0.003)   | 0.006<br>(0.003)    | 0.004<br>(0.004)   |
| Household income                   |                     |                    |                     |                    |
| Under \$30,000 (ref.)              |                     |                    |                     |                    |
| \$30,001 - \$60,000                |                     | 0.027<br>(0.063)   | 0.061<br>(0.071)    | 0.070<br>(0.070)   |
| \$60,000 - \$150,000+              |                     | 0.096<br>(0.061)   | 0.090<br>(0.072)    | 0.041<br>(0.075)   |
| Parent education                   |                     |                    |                     |                    |
| <High school (ref.)                |                     |                    |                     |                    |
| High school                        |                     | 0.014<br>(0.091)   | -0.109<br>(0.115)   | -0.120<br>(0.113)  |
| Some college                       |                     | 0.096<br>(0.091)   | 0.012<br>(0.114)    | -0.044<br>(0.116)  |
| College degree                     |                     | 0.219+<br>(0.120)  | 0.056<br>(0.147)    | -0.065<br>(0.146)  |
| Graduate degree                    |                     | 0.200+<br>(0.119)  | 0.031<br>(0.146)    | -0.098<br>(0.142)  |
| Parent marital status              |                     |                    |                     |                    |

## APPENDIX: RACIAL SEGREGATION IN ACTIVITY SPACE

|                                     |                      |                      |                      |                     |
|-------------------------------------|----------------------|----------------------|----------------------|---------------------|
| Married (ref.)                      |                      |                      |                      |                     |
| Cohabiting                          |                      | -0.022<br>(0.090)    | -0.069<br>(0.104)    | -0.102<br>(0.111)   |
| Single                              |                      | -0.066<br>(0.075)    | -0.145<br>(0.103)    | -0.081<br>(0.101)   |
| Other                               |                      | -0.200**<br>(0.064)  | -0.252**<br>(0.084)  | -0.218*<br>(0.088)  |
| Residence owned (vs. rented)        |                      | -0.018<br>(0.061)    | -0.084<br>(0.076)    | -0.046<br>(0.067)   |
| Years lived in current neighborhood |                      | 0.000<br>(0.002)     | 0.002<br>(0.004)     | -0.000<br>(0.003)   |
| Moved in the past two years         |                      | -0.044<br>(0.059)    | -0.058<br>(0.073)    | -0.071<br>(0.078)   |
| Foreign born                        |                      | 0.011<br>(0.100)     | 0.029<br>(0.162)     | -0.163<br>(0.143)   |
| Age                                 | 0.004<br>(0.014)     | -0.010<br>(0.012)    | -0.023+<br>(0.014)   | -0.010<br>(0.012)   |
| Male                                | 0.088+<br>(0.049)    | 0.128**<br>(0.040)   | 0.178**<br>(0.058)   | 0.124*<br>(0.057)   |
| Respondent Black (vs. white)        | -1.062***<br>(0.086) | -0.286***<br>(0.063) | -0.277***<br>(0.074) | -0.228**<br>(0.072) |
| Neighborhood-level measures         |                      |                      |                      |                     |
| Tract concentrated disadvantage     |                      | -0.054<br>(0.043)    | -0.025<br>(0.106)    |                     |
| Tract proportion Black              |                      |                      |                      |                     |
| Tract collective efficacy           |                      | 0.473***<br>(0.059)  | 0.503***<br>(0.119)  |                     |
| ln(Tract Violent crime rate)        |                      |                      |                      |                     |
| Constant                            | 0.419+<br>(0.231)    | -0.390<br>(0.402)    | -0.478<br>(0.564)    | 0.263<br>(0.653)    |
| Fixed Effects                       |                      |                      |                      | ✓                   |
| N: Neighborhood-level               | 178                  | 178                  | 89                   | 89                  |
| N: Individual-level                 | 1180                 | 1180                 | 674                  | 674                 |

\*p < .05; \*\*p < .01; \*\*\*p < .001; two-tailed tests.

Notes: The following variables are z-score standardized: Tract concentrated disadvantage, tract collective efficacy, non-home concentrated disadvantage, and non-home collective efficacy.

APPENDIX: RACIAL SEGREGATION IN ACTIVITY SPACE

Appendix Table 5. Linear regression models for non-home exposure to violent crime with cluster robust standard errors.

|                                    | <b>ln(Violent Crime)</b> |         |         |         |
|------------------------------------|--------------------------|---------|---------|---------|
|                                    | Model 1                  | Model 2 | Model 3 | Model 4 |
| ln(Block group population density) |                          | -0.094* | -0.100+ | -0.079  |
|                                    |                          | (0.043) | (0.054) | (0.091) |
| Total non-home time (minutes)      |                          | 0.000** | 0.000*  | 0.000   |
|                                    |                          | (0.000) | (0.000) | (0.000) |
| Season                             |                          |         |         |         |
| Winter (December-February) (ref.)  |                          |         |         |         |
| Spring (March-May)                 |                          | 0.050   | -0.068  | -0.050  |
|                                    |                          | (0.061) | (0.071) | (0.080) |
| Summer (June-August)               |                          | 0.028   | -0.017  | -0.025  |
|                                    |                          | (0.065) | (0.086) | (0.095) |
| Autumn (September-November)        |                          | 0.084   | 0.048   | 0.038   |
|                                    |                          | (0.061) | (0.083) | (0.084) |
| Number of Weekend Days             |                          |         |         |         |
| 0                                  |                          | 0.159   | 0.313+  | 0.362*  |
|                                    |                          | (0.162) | (0.161) | (0.178) |
| 1                                  |                          | 0.209+  | 0.147   | 0.054   |
|                                    |                          | (0.112) | (0.125) | (0.140) |
| 2 (ref.)                           |                          |         |         |         |
| Family Controls                    |                          |         |         |         |
| Household size                     |                          | -0.025+ | -0.022  | -0.021  |
|                                    |                          | (0.014) | (0.018) | (0.019) |
| Parent male                        |                          | 0.082   | 0.070   | 0.010   |
|                                    |                          | (0.076) | (0.093) | (0.084) |
| Parent age                         |                          | -0.000  | 0.001   | -0.000  |
|                                    |                          | (0.003) | (0.004) | (0.004) |
| Household income                   |                          |         |         |         |
| Under \$30,000 (ref.)              |                          |         |         |         |
| \$30,001 - \$60,000                |                          | -0.079  | -0.069  | -0.045  |
|                                    |                          | (0.061) | (0.082) | (0.088) |
| \$60,000 - \$150,000+              |                          | -0.138+ | 0.003   | 0.049   |
|                                    |                          | (0.083) | (0.107) | (0.118) |
| Parent education                   |                          |         |         |         |
| <High school (ref.)                |                          |         |         |         |
| High school                        |                          | 0.064   | 0.069   | 0.048   |
|                                    |                          | (0.106) | (0.149) | (0.158) |
| Some college                       |                          | -0.053  | -0.034  | -0.031  |
|                                    |                          | (0.103) | (0.142) | (0.155) |
| College degree                     |                          | -0.145  | -0.132  | -0.107  |
|                                    |                          | (0.126) | (0.174) | (0.177) |
| Graduate degree                    |                          | -0.049  | -0.038  | -0.021  |
|                                    |                          | (0.131) | (0.176) | (0.185) |
| Parent marital status              |                          |         |         |         |

## APPENDIX: RACIAL SEGREGATION IN ACTIVITY SPACE

|                                     |          |          |          |         |
|-------------------------------------|----------|----------|----------|---------|
| Married (ref.)                      |          |          |          |         |
| Cohabiting                          |          | 0.061    | 0.143    | 0.162   |
|                                     |          | (0.088)  | (0.104)  | (0.113) |
| Single                              |          | -0.063   | 0.086    | 0.103   |
|                                     |          | (0.068)  | (0.086)  | (0.094) |
| Other                               |          | 0.025    | 0.144    | 0.105   |
|                                     |          | (0.076)  | (0.091)  | (0.089) |
| Residence owned (vs. rented)        |          | -0.082   | -0.027   | -0.121  |
|                                     |          | (0.063)  | (0.076)  | (0.077) |
| Years lived in current neighborhood |          | 0.001    | 0.000    | 0.002   |
|                                     |          | (0.002)  | (0.003)  | (0.004) |
| Moved in the past two years         |          | 0.002    | -0.011   | 0.032   |
|                                     |          | (0.072)  | (0.093)  | (0.098) |
| Foreign born                        |          | -0.015   | -0.184   | -0.192  |
|                                     |          | (0.137)  | (0.189)  | (0.255) |
| Age                                 | 0.004    | 0.033**  | 0.007    | 0.013   |
|                                     | (0.017)  | (0.012)  | (0.015)  | (0.015) |
| Male                                | -0.032   | -0.029   | 0.004    | -0.013  |
|                                     | (0.067)  | (0.049)  | (0.062)  | (0.063) |
| Respondent Black (vs. white)        | 1.435*** | 0.249*** | 0.226**  | 0.171*  |
|                                     | (0.123)  | (0.061)  | (0.072)  | (0.076) |
| Neighborhood-level measures         |          |          |          |         |
| Tract concentrated disadvantage     |          | 0.135*   | 0.176*   |         |
|                                     |          | (0.061)  | (0.073)  |         |
| Tract proportion Black              |          |          |          |         |
| Tract collective efficacy           |          |          |          |         |
| ln(Tract Violent crime rate)        |          | 0.586*** | 0.654*** |         |
|                                     |          | (0.062)  | (0.053)  |         |
| Constant                            | -0.201   | -0.521   | -0.423   | 1.159   |
|                                     | (0.293)  | (0.448)  | (0.593)  | (0.893) |
| Fixed Effects                       |          |          |          | ✓       |
| N: Neighborhood-level               | 178      | 178      | 89       | 89      |
| N: Individual-level                 | 1180     | 1180     | 674      | 674     |

\*p < .05; \*\*p < .01; \*\*\*p < .001; two-tailed tests.

Notes: The following variables are z-score standardized: Tract concentrated disadvantage, tract collective efficacy, non-home concentrated disadvantage, and non-home collective efficacy.

## Full Tables for Interaction Models Presented in Table 3

Appendix Table 6. Linear regression models for non-home exposure to concentrated disadvantage with cluster robust standard errors and interactions.

|                                    | Concentrated Disadvantage |                    |                    |                    |                    |                    |                    |
|------------------------------------|---------------------------|--------------------|--------------------|--------------------|--------------------|--------------------|--------------------|
|                                    | Model 1                   | Model 2            | Model 3            | Model 4            | Model 5            | Model 6            | Model 7            |
| ln(Block group population density) | -0.028<br>(0.038)         | -0.043<br>(0.042)  | -0.011<br>(0.074)  | -0.043<br>(0.043)  | -0.015<br>(0.073)  | -0.046<br>(0.042)  | -0.013<br>(0.073)  |
| Total non-home time (minutes)      | -0.000*<br>(0.000)        | -0.000+<br>(0.000) | -0.000*<br>(0.000) | -0.000+<br>(0.000) | 0.000**<br>(0.000) | -0.000+<br>(0.000) | 0.000**<br>(0.000) |
| Season                             |                           |                    |                    |                    |                    |                    |                    |
| Winter (December-February) (ref.)  |                           |                    |                    |                    |                    |                    |                    |
| Spring (March-May)                 | 0.132*<br>(0.066)         | 0.127+<br>(0.069)  | 0.070<br>(0.087)   | 0.128+<br>(0.070)  | 0.067<br>(0.087)   | 0.127+<br>(0.069)  | 0.066<br>(0.087)   |
| Summer (June-August)               | 0.103<br>(0.063)          | 0.112<br>(0.073)   | 0.096<br>(0.090)   | 0.113<br>(0.073)   | 0.098<br>(0.089)   | 0.112<br>(0.073)   | 0.096<br>(0.089)   |
| Autumn (September-November)        | 0.054<br>(0.064)          | 0.035<br>(0.071)   | 0.158+<br>(0.085)  | 0.035<br>(0.071)   | 0.157+<br>(0.084)  | 0.038<br>(0.071)   | 0.160+<br>(0.084)  |
| Number of Weekend Days             |                           |                    |                    |                    |                    |                    |                    |
| 0                                  | -0.053<br>(0.164)         | -0.077<br>(0.197)  | -0.092<br>(0.207)  | -0.074<br>(0.196)  | -0.077<br>(0.206)  | -0.084<br>(0.197)  | -0.096<br>(0.202)  |
| 1                                  | -0.081<br>(0.123)         | -0.094<br>(0.095)  | -0.115<br>(0.132)  | -0.100<br>(0.095)  | -0.118<br>(0.130)  | -0.090<br>(0.094)  | -0.115<br>(0.132)  |
| 2 (ref.)                           |                           |                    |                    |                    |                    |                    |                    |
| Family Controls                    |                           |                    |                    |                    |                    |                    |                    |
| Household size                     | 0.024<br>(0.015)          | 0.025<br>(0.018)   | 0.030<br>(0.022)   | 0.025<br>(0.017)   | 0.029<br>(0.022)   | 0.025<br>(0.018)   | 0.030<br>(0.022)   |
| Parent male                        | 0.057<br>(0.069)          | 0.050<br>(0.069)   | 0.058<br>(0.104)   | 0.051<br>(0.069)   | 0.056<br>(0.105)   | 0.048<br>(0.069)   | 0.055<br>(0.105)   |
| Parent age                         | 0.001<br>(0.003)          | 0.001<br>(0.003)   | 0.002<br>(0.004)   | 0.001<br>(0.003)   | 0.002<br>(0.004)   | 0.001<br>(0.003)   | 0.002<br>(0.004)   |
| Household income                   |                           |                    |                    |                    |                    |                    |                    |
| Under \$30,000 (ref.)              |                           |                    |                    |                    |                    |                    |                    |
| \$30,001 - \$60,000                | -0.149*<br>(0.066)        | -0.146*<br>(0.072) | -0.124<br>(0.084)  | -0.139+<br>(0.072) | -0.118<br>(0.085)  | -0.144*<br>(0.072) | -0.122<br>(0.084)  |
| \$60,000 - \$150,000+              | -0.158*<br>(0.076)        | -0.210*<br>(0.082) | -0.076<br>(0.108)  | -0.208*<br>(0.081) | -0.070<br>(0.109)  | -0.213*<br>(0.082) | -0.076<br>(0.108)  |
| Parent education                   |                           |                    |                    |                    |                    |                    |                    |
| <High school (ref.)                |                           |                    |                    |                    |                    |                    |                    |
| High school                        | 0.070<br>(0.114)          | 0.078<br>(0.130)   | 0.092<br>(0.147)   | 0.082<br>(0.131)   | 0.091<br>(0.146)   | 0.078<br>(0.129)   | 0.086<br>(0.145)   |
| Some college                       | -0.074<br>(0.107)         | -0.092<br>(0.126)  | 0.044<br>(0.163)   | -0.093<br>(0.125)  | 0.038<br>(0.162)   | -0.093<br>(0.125)  | 0.040<br>(0.163)   |
| College degree                     | -0.080<br>(0.121)         | -0.146<br>(0.150)  | 0.180<br>(0.198)   | -0.144<br>(0.150)  | 0.178<br>(0.196)   | -0.148<br>(0.149)  | 0.172<br>(0.197)   |
| Graduate degree                    | -0.074<br>(0.128)         | -0.159<br>(0.152)  | 0.127<br>(0.204)   | -0.158<br>(0.152)  | 0.121<br>(0.202)   | -0.159<br>(0.151)  | 0.120<br>(0.203)   |
| Parent marital status              |                           |                    |                    |                    |                    |                    |                    |
| Married (ref.)                     |                           |                    |                    |                    |                    |                    |                    |
| Cohabiting                         | 0.030<br>(0.087)          | 0.045<br>(0.095)   | 0.041<br>(0.121)   | 0.051<br>(0.095)   | 0.051<br>(0.119)   | 0.052<br>(0.096)   | 0.054<br>(0.121)   |
| Single                             | 0.107<br>(0.081)          | 0.136<br>(0.092)   | 0.145<br>(0.119)   | 0.132<br>(0.092)   | 0.138<br>(0.119)   | 0.142<br>(0.093)   | 0.152<br>(0.120)   |
| Other                              | 0.066<br>(0.072)          | 0.048<br>(0.069)   | 0.038<br>(0.104)   | 0.050<br>(0.069)   | 0.037<br>(0.103)   | 0.052<br>(0.069)   | 0.042<br>(0.103)   |

APPENDIX: RACIAL SEGREGATION IN ACTIVITY SPACE

|                                     |          |          |         |          |         |          |         |
|-------------------------------------|----------|----------|---------|----------|---------|----------|---------|
| Residence owned (vs. rented)        | -0.116+  | -0.081   | -0.116  | -0.084   | -0.123  | -0.077   | -0.111  |
|                                     | (0.068)  | (0.069)  | (0.086) | (0.069)  | (0.087) | (0.069)  | (0.087) |
| Years lived in current neighborhood | 0.004    | 0.003    | 0.008*  | 0.003    | 0.007*  | 0.003    | 0.007*  |
|                                     | (0.003)  | (0.003)  | (0.004) | (0.003)  | (0.004) | (0.003)  | (0.004) |
| Moved in the past two years         | 0.091    | 0.079    | 0.160   | 0.079    | 0.164+  | -0.015   | 0.097   |
|                                     | (0.066)  | (0.075)  | (0.098) | (0.075)  | (0.098) | (0.097)  | (0.132) |
| Foreign born                        | -0.194   | -0.219+  | -0.181  | -0.228*  | -0.176  | -0.210+  | -0.162  |
|                                     | (0.160)  | (0.116)  | (0.209) | (0.113)  | (0.206) | (0.113)  | (0.207) |
| Age                                 | -0.004   | -0.003   | -0.017  | 0.013    | 0.001   | -0.004   | -0.017  |
|                                     | (0.013)  | (0.013)  | (0.015) | (0.016)  | (0.021) | (0.013)  | (0.015) |
| Male                                | -0.095*  | -0.068   | -0.119  | -0.081+  | 0.158** | -0.082+  | 0.158** |
|                                     | (0.044)  | (0.057)  | (0.080) | (0.045)  | (0.057) | (0.045)  | (0.057) |
| Respondent Black (vs. white)        | 0.176*   | 0.179*   | 0.132   | 0.656+   | 0.609   | 0.140+   | 0.074   |
|                                     | (0.069)  | (0.078)  | (0.102) | (0.365)  | (0.513) | (0.073)  | (0.094) |
| Neighborhood-level measures         |          |          |         |          |         |          |         |
| Tract concentrated disadvantage     | 0.504*** | 0.407*** |         | 0.408*** |         | 0.409*** |         |
|                                     | (0.055)  | (0.047)  |         | (0.047)  |         | (0.047)  |         |
| Tract proportion Black              |          |          |         |          |         |          |         |
| Tract collective efficacy           |          |          |         |          |         |          |         |
| ln(Tract Violent crime rate)        |          |          |         |          |         |          |         |
| Interaction terms                   |          |          |         |          |         |          |         |
| Black * Tract Disadvantage          | -0.119+  |          |         |          |         |          |         |
|                                     | (0.067)  |          |         |          |         |          |         |
| Black * Male                        |          | -0.027   | -0.080  |          |         |          |         |
|                                     |          | (0.086)  | (0.115) |          |         |          |         |
| Black * Age                         |          |          |         | -0.034   | -0.036  |          |         |
|                                     |          |          |         | (0.025)  | (0.035) |          |         |
| Black * Moved                       |          |          |         |          |         | 0.147    | 0.104   |
|                                     |          |          |         |          |         | (0.131)  | (0.170) |
| Constant                            | 0.177    | 0.282    | 0.174   | 0.054    | -0.028  | 0.320    | 0.222   |
|                                     | (0.408)  | (0.446)  | (0.750) | (0.482)  | (0.763) | (0.440)  | (0.736) |
| Fixed Effects                       |          |          | ✓       |          | ✓       |          | ✓       |
| N: Neighborhood-level               | 178      | 178      | 89      | 178      | 89      | 178      | 89      |
| N: Individual-level                 | 1180     | 1180     | 674     | 1180     | 674     | 1180     | 674     |

\*p < .05; \*\*p < .01; \*\*\*p < .001; two-tailed tests.

Notes: Models including an interaction for Black \* Tract Disadvantage are two-level linear multilevel models clustering on census tracts, and include a random slope term for Black (vs. white) respondent. All other models are single-level linear regression models with cluster robust standard errors. The following variables are z-score standardized: Tract concentrated disadvantage, tract collective efficacy, non-home collective efficacy, and non-home concentrated disadvantage.



APPENDIX: RACIAL SEGREGATION IN ACTIVITY SPACE

Appendix Table 7. Linear regression models for non-home exposure to proportion Black with cluster robust standard errors and interactions.

|                                    | Proportion Black   |                    |                    |                    |                    |                    |                    |
|------------------------------------|--------------------|--------------------|--------------------|--------------------|--------------------|--------------------|--------------------|
|                                    | Model 1            | Model 2            | Model 3            | Model 4            | Model 5            | Model 6            | Model 7            |
| ln(Block group population density) | -0.004<br>(0.008)  | -0.001<br>(0.008)  | -0.019<br>(0.013)  | -0.001<br>(0.008)  | -0.020<br>(0.013)  | -0.001<br>(0.008)  | -0.020<br>(0.013)  |
| Total non-home time (minutes)      | -0.000<br>(0.000)  |
| Season                             |                    |                    |                    |                    |                    |                    |                    |
| Winter (December-February) (ref.)  |                    |                    |                    |                    |                    |                    |                    |
| Spring (March-May)                 | 0.028+<br>(0.014)  | 0.028*<br>(0.013)  | 0.018<br>(0.019)   | 0.028*<br>(0.013)  | 0.017<br>(0.020)   | 0.028*<br>(0.013)  | 0.017<br>(0.020)   |
| Summer (June-August)               | 0.018<br>(0.014)   | 0.017<br>(0.013)   | 0.020<br>(0.018)   | 0.017<br>(0.013)   | 0.020<br>(0.018)   | 0.017<br>(0.013)   | 0.020<br>(0.018)   |
| Autumn (September-November)        | -0.003<br>(0.014)  | -0.006<br>(0.015)  | 0.008<br>(0.022)   | -0.005<br>(0.015)  | 0.008<br>(0.022)   | -0.005<br>(0.015)  | 0.009<br>(0.022)   |
| Number of Weekend Days             |                    |                    |                    |                    |                    |                    |                    |
| 0                                  | 0.009<br>(0.035)   | 0.010<br>(0.031)   | 0.007<br>(0.050)   | 0.011<br>(0.030)   | 0.011<br>(0.049)   | 0.009<br>(0.031)   | 0.007<br>(0.049)   |
| 1                                  | -0.015<br>(0.026)  | -0.009<br>(0.025)  | -0.021<br>(0.042)  | -0.011<br>(0.026)  | -0.022<br>(0.042)  | -0.009<br>(0.025)  | -0.022<br>(0.042)  |
| 2 (ref.)                           |                    |                    |                    |                    |                    |                    |                    |
| Family Controls                    |                    |                    |                    |                    |                    |                    |                    |
| Household size                     | 0.002<br>(0.003)   | 0.002<br>(0.004)   | 0.005<br>(0.005)   | 0.002<br>(0.004)   | 0.005<br>(0.005)   | 0.002<br>(0.004)   | 0.005<br>(0.005)   |
| Parent male                        | -0.004<br>(0.015)  | -0.004<br>(0.013)  | -0.021<br>(0.019)  | -0.003<br>(0.012)  | -0.022<br>(0.019)  | -0.004<br>(0.012)  | -0.022<br>(0.019)  |
| Parent age                         | 0.001<br>(0.001)   |
| Household income                   |                    |                    |                    |                    |                    |                    |                    |
| Under \$30,000 (ref.)              |                    |                    |                    |                    |                    |                    |                    |
| \$30,001 - \$60,000                | -0.018<br>(0.015)  | -0.020<br>(0.017)  | -0.018<br>(0.019)  | -0.018<br>(0.017)  | -0.016<br>(0.019)  | -0.019<br>(0.017)  | -0.017<br>(0.019)  |
| \$60,000 - \$150,000+              | -0.022<br>(0.017)  | -0.028<br>(0.018)  | -0.002<br>(0.024)  | -0.027<br>(0.018)  | -0.001<br>(0.024)  | -0.028<br>(0.018)  | -0.002<br>(0.024)  |
| Parent education                   |                    |                    |                    |                    |                    |                    |                    |
| <High school (ref.)                |                    |                    |                    |                    |                    |                    |                    |
| High school                        | -0.002<br>(0.024)  | -0.011<br>(0.024)  | 0.027<br>(0.029)   | -0.010<br>(0.024)  | 0.026<br>(0.029)   | -0.011<br>(0.024)  | 0.025<br>(0.028)   |
| Some college                       | -0.001<br>(0.023)  | -0.009<br>(0.025)  | 0.025<br>(0.032)   | -0.009<br>(0.025)  | 0.024<br>(0.032)   | -0.009<br>(0.025)  | 0.025<br>(0.032)   |
| College degree                     | -0.011<br>(0.026)  | -0.019<br>(0.029)  | 0.033<br>(0.038)   | -0.019<br>(0.029)  | 0.033<br>(0.038)   | -0.020<br>(0.029)  | 0.032<br>(0.038)   |
| Graduate degree                    | -0.006<br>(0.027)  | -0.015<br>(0.029)  | 0.031<br>(0.038)   | -0.015<br>(0.029)  | 0.029<br>(0.038)   | -0.015<br>(0.028)  | 0.029<br>(0.038)   |
| Parent marital status              |                    |                    |                    |                    |                    |                    |                    |
| Married (ref.)                     |                    |                    |                    |                    |                    |                    |                    |
| Cohabiting                         | 0.006<br>(0.019)   | 0.008<br>(0.020)   | -0.004<br>(0.025)  | 0.011<br>(0.020)   | -0.001<br>(0.025)  | 0.011<br>(0.020)   | -0.001<br>(0.025)  |
| Single                             | 0.037*<br>(0.017)  | 0.043*<br>(0.019)  | 0.020<br>(0.028)   | 0.043*<br>(0.019)  | 0.019<br>(0.028)   | 0.045*<br>(0.019)  | 0.022<br>(0.028)   |
| Other                              | 0.008<br>(0.016)   | 0.004<br>(0.014)   | 0.001<br>(0.021)   | 0.004<br>(0.014)   | 0.001<br>(0.021)   | 0.004<br>(0.014)   | 0.002<br>(0.021)   |
| Residence owned (vs. rented)       | -0.036*<br>(0.014) | -0.033*<br>(0.016) | -0.044*<br>(0.019) | -0.034*<br>(0.016) | -0.044*<br>(0.020) | -0.032*<br>(0.016) | -0.042*<br>(0.020) |

## APPENDIX: RACIAL SEGREGATION IN ACTIVITY SPACE

|                                     |                     |                     |                     |                     |                    |                     |                     |
|-------------------------------------|---------------------|---------------------|---------------------|---------------------|--------------------|---------------------|---------------------|
| Years lived in current neighborhood | 0.002**<br>(0.001)  | 0.001*<br>(0.001)   | 0.002*<br>(0.001)   | 0.001*<br>(0.001)   | 0.002*<br>(0.001)  | 0.001*<br>(0.001)   | 0.002*<br>(0.001)   |
| Moved in the past two years         | 0.036*<br>(0.014)   | 0.035*<br>(0.014)   | 0.045*<br>(0.018)   | 0.034*<br>(0.014)   | 0.046*<br>(0.018)  | 0.015<br>(0.019)    | 0.041<br>(0.028)    |
| Foreign born                        | -0.066+<br>(0.034)  | -0.070*<br>(0.028)  | -0.069<br>(0.057)   | -0.071*<br>(0.029)  | -0.066<br>(0.058)  | -0.068*<br>(0.029)  | -0.065<br>(0.058)   |
| Age                                 | 0.002<br>(0.003)    | 0.000<br>(0.003)    | 0.002<br>(0.003)    | 0.004<br>(0.003)    | 0.006<br>(0.004)   | 0.000<br>(0.003)    | 0.002<br>(0.003)    |
| Male                                | -0.017+<br>(0.010)  | -0.005<br>(0.012)   | -0.015<br>(0.016)   | -0.017+<br>(0.009)  | 0.033**<br>(0.012) | -0.017+<br>(0.009)  | -0.033*<br>(0.013)  |
| Respondent Black (vs. white)        | 0.089***<br>(0.015) | 0.101***<br>(0.018) | 0.109***<br>(0.019) | 0.202**<br>(0.077)  | 0.205+<br>(0.114)  | 0.084***<br>(0.017) | 0.090***<br>(0.019) |
| Neighborhood-level measures         |                     |                     |                     |                     |                    |                     |                     |
| Tract concentrated disadvantage     | 0.018<br>(0.013)    | 0.019+<br>(0.011)   |                     | 0.019+<br>(0.012)   |                    | 0.020+<br>(0.012)   |                     |
| Tract proportion Black              | 0.374***<br>(0.037) | 0.357***<br>(0.040) |                     | 0.358***<br>(0.040) |                    | 0.358***<br>(0.040) |                     |
| Tract collective efficacy           |                     |                     |                     |                     |                    |                     |                     |
| ln(Tract Violent crime rate)        |                     |                     |                     |                     |                    |                     |                     |
| Interaction terms                   |                     |                     |                     |                     |                    |                     |                     |
| Black * Tract Disadvantage          | -0.001<br>(0.014)   |                     |                     |                     |                    |                     |                     |
| Black * Male                        |                     | -0.023<br>(0.018)   | -0.036<br>(0.023)   |                     |                    |                     |                     |
| Black * Age                         |                     |                     |                     | -0.008<br>(0.005)   | -0.008<br>(0.008)  |                     |                     |
| Black * Moved                       |                     |                     |                     |                     |                    | 0.030<br>(0.026)    | 0.007<br>(0.036)    |
| Constant                            | 0.089<br>(0.087)    | 0.074<br>(0.086)    | 0.305*<br>(0.138)   | 0.028<br>(0.089)    | 0.268+<br>(0.144)  | 0.088<br>(0.085)    | 0.322*<br>(0.135)   |
| Fixed Effects                       |                     |                     | ✓                   |                     | ✓                  |                     | ✓                   |
| N: Neighborhood-level               | 178                 | 178                 | 89                  | 178                 | 89                 | 178                 | 89                  |
| N: Individual-level                 | 1180                | 1180                | 674                 | 1180                | 674                | 1180                | 674                 |

\*p < .05; \*\*p < .01; \*\*\*p < .001; two-tailed tests.

Notes: Models including an interaction for Black \* Tract Disadvantage are two-level linear multilevel models clustering on census tracts, and include a random slope term for Black (vs. white) respondent. All other models are single-level linear regression models with cluster robust standard errors. The following variables are z-score standardized: Tract concentrated disadvantage, tract collective efficacy, non-home collective efficacy, and non-home concentrated disadvantage.

APPENDIX: RACIAL SEGREGATION IN ACTIVITY SPACE

Appendix Table 8. Linear regression models for non-home exposure to collective efficacy with cluster robust standard errors and interactions.

|                                    | Collective Efficacy |                     |                    |                     |                    |                     |                    |
|------------------------------------|---------------------|---------------------|--------------------|---------------------|--------------------|---------------------|--------------------|
|                                    | Model 1             | Model 2             | Model 3            | Model 4             | Model 5            | Model 6             | Model 7            |
| ln(Block group population density) | 0.031<br>(0.035)    | 0.056<br>(0.040)    | -0.002<br>(0.069)  | 0.057<br>(0.040)    | 0.001<br>(0.069)   | 0.060<br>(0.040)    | 0.001<br>(0.069)   |
| Total non-home time (minutes)      | 0.000<br>(0.000)    | 0.000*<br>(0.000)   | 0.000<br>(0.000)   | 0.000*<br>(0.000)   | 0.000<br>(0.000)   | 0.000*<br>(0.000)   | 0.000<br>(0.000)   |
| Season                             |                     |                     |                    |                     |                    |                     |                    |
| Winter (December-February) (ref.)  |                     |                     |                    |                     |                    |                     |                    |
| Spring (March-May)                 | -0.106+<br>(0.059)  | -0.094+<br>(0.055)  | -0.098<br>(0.070)  | -0.096+<br>(0.055)  | -0.097<br>(0.070)  | -0.095+<br>(0.054)  | -0.098<br>(0.071)  |
| Summer (June-August)               | -0.165**<br>(0.056) | -0.150*<br>(0.062)  | -0.228*<br>(0.090) | -0.151*<br>(0.062)  | -0.227*<br>(0.089) | -0.151*<br>(0.062)  | -0.227*<br>(0.089) |
| Autumn (September-November)        | -0.071<br>(0.057)   | -0.061<br>(0.060)   | -0.117<br>(0.087)  | -0.062<br>(0.060)   | -0.118<br>(0.087)  | -0.065<br>(0.060)   | -0.116<br>(0.088)  |
| Number of Weekend Days             |                     |                     |                    |                     |                    |                     |                    |
| 0                                  | 0.022<br>(0.147)    | -0.003<br>(0.197)   | 0.035<br>(0.138)   | -0.007<br>(0.196)   | 0.039<br>(0.138)   | 0.006<br>(0.198)    | 0.030<br>(0.138)   |
| 1                                  | -0.024<br>(0.110)   | 0.023<br>(0.113)    | -0.018<br>(0.108)  | 0.031<br>(0.115)    | -0.018<br>(0.108)  | 0.018<br>(0.112)    | -0.017<br>(0.108)  |
| 2 (ref.)                           |                     |                     |                    |                     |                    |                     |                    |
| Family Controls                    |                     |                     |                    |                     |                    |                     |                    |
| Household size                     | -0.024+<br>(0.013)  | -0.023<br>(0.014)   | -0.046*<br>(0.019) | -0.023<br>(0.014)   | -0.046*<br>(0.019) | -0.023<br>(0.014)   | -0.046*<br>(0.019) |
| Parent male                        | 0.033<br>(0.062)    | 0.036<br>(0.059)    | 0.083<br>(0.082)   | 0.034<br>(0.058)    | 0.086<br>(0.082)   | 0.038<br>(0.059)    | 0.086<br>(0.082)   |
| Parent age                         | 0.003<br>(0.003)    | 0.003<br>(0.003)    | 0.004<br>(0.004)   | 0.003<br>(0.003)    | 0.004<br>(0.004)   | 0.003<br>(0.003)    | 0.004<br>(0.004)   |
| Household income                   |                     |                     |                    |                     |                    |                     |                    |
| Under \$30,000 (ref.)              |                     |                     |                    |                     |                    |                     |                    |
| \$30,001 - \$60,000                | 0.052<br>(0.061)    | 0.030<br>(0.064)    | 0.072<br>(0.070)   | 0.019<br>(0.063)    | 0.072<br>(0.070)   | 0.026<br>(0.063)    | 0.071<br>(0.070)   |
| \$60,000 - \$150,000+              | 0.079<br>(0.069)    | 0.097<br>(0.061)    | 0.041<br>(0.074)   | 0.093<br>(0.061)    | 0.043<br>(0.074)   | 0.101<br>(0.061)    | 0.041<br>(0.075)   |
| Parent education                   |                     |                     |                    |                     |                    |                     |                    |
| <High school (ref.)                |                     |                     |                    |                     |                    |                     |                    |
| High school                        | 0.010<br>(0.102)    | 0.011<br>(0.091)    | -0.121<br>(0.113)  | 0.008<br>(0.090)    | -0.120<br>(0.113)  | 0.013<br>(0.090)    | -0.123<br>(0.112)  |
| Some college                       | 0.074<br>(0.096)    | 0.095<br>(0.091)    | -0.044<br>(0.116)  | 0.096<br>(0.091)    | -0.046<br>(0.117)  | 0.097<br>(0.091)    | -0.047<br>(0.116)  |
| College degree                     | 0.159<br>(0.109)    | 0.218+<br>(0.120)   | -0.066<br>(0.146)  | 0.216+<br>(0.120)   | -0.065<br>(0.146)  | 0.221+<br>(0.120)   | -0.070<br>(0.145)  |
| Graduate degree                    | 0.115<br>(0.115)    | 0.199+<br>(0.119)   | -0.103<br>(0.142)  | 0.199+<br>(0.118)   | -0.099<br>(0.142)  | 0.200+<br>(0.119)   | -0.100<br>(0.142)  |
| Parent marital status              |                     |                     |                    |                     |                    |                     |                    |
| Married (ref.)                     |                     |                     |                    |                     |                    |                     |                    |
| Cohabiting                         | -0.024<br>(0.078)   | -0.018<br>(0.090)   | -0.095<br>(0.113)  | -0.028<br>(0.088)   | -0.100<br>(0.111)  | -0.030<br>(0.089)   | -0.096<br>(0.112)  |
| Single                             | -0.066<br>(0.069)   | -0.064<br>(0.075)   | -0.078<br>(0.102)  | -0.060<br>(0.075)   | -0.085<br>(0.102)  | -0.072<br>(0.075)   | -0.079<br>(0.101)  |
| Other                              | -0.205**<br>(0.065) | -0.199**<br>(0.064) | -0.217*<br>(0.089) | -0.202**<br>(0.063) | -0.218*<br>(0.088) | -0.205**<br>(0.064) | -0.215*<br>(0.089) |
| Residence owned (vs. rented)       | 0.007<br>(0.060)    | -0.018<br>(0.061)   | -0.041<br>(0.067)  | -0.014<br>(0.061)   | -0.049<br>(0.068)  | -0.023<br>(0.061)   | -0.044<br>(0.066)  |

APPENDIX: RACIAL SEGREGATION IN ACTIVITY SPACE

|                                     |                      |                      |                     |                     |                   |                      |                     |
|-------------------------------------|----------------------|----------------------|---------------------|---------------------|-------------------|----------------------|---------------------|
| Years lived in current neighborhood | -0.000<br>(0.002)    | 0.000<br>(0.002)     | -0.000<br>(0.003)   | 0.001<br>(0.002)    | -0.000<br>(0.003) | 0.001<br>(0.002)     | -0.000<br>(0.003)   |
| Moved in the past two years         | -0.052<br>(0.059)    | -0.045<br>(0.059)    | -0.070<br>(0.078)   | -0.045<br>(0.058)   | -0.070<br>(0.078) | 0.079<br>(0.097)     | -0.119<br>(0.124)   |
| Foreign born                        | -0.053<br>(0.143)    | 0.015<br>(0.099)     | -0.153<br>(0.144)   | 0.023<br>(0.099)    | -0.164<br>(0.143) | 0.001<br>(0.098)     | -0.156<br>(0.143)   |
| Age                                 | -0.009<br>(0.011)    | -0.010<br>(0.012)    | -0.010<br>(0.012)   | -0.030*<br>(0.015)  | -0.004<br>(0.017) | -0.009<br>(0.012)    | -0.011<br>(0.012)   |
| Male                                | 0.114**<br>(0.040)   | 0.090<br>(0.061)     | 0.079<br>(0.089)    | 0.127**<br>(0.040)  | 0.125*<br>(0.057) | 0.128**<br>(0.041)   | 0.125*<br>(0.057)   |
| Respondent Black (vs. white)        | -0.273***<br>(0.060) | -0.323***<br>(0.076) | -0.272**<br>(0.093) | -0.899**<br>(0.312) | -0.050<br>(0.395) | -0.252***<br>(0.068) | -0.242**<br>(0.080) |
| Neighborhood-level measures         |                      |                      |                     |                     |                   |                      |                     |
| Tract concentrated disadvantage     | -0.119+<br>(0.068)   | -0.053<br>(0.043)    |                     | -0.055<br>(0.043)   |                   | -0.056<br>(0.043)    |                     |
| Tract proportion Black              |                      |                      |                     |                     |                   |                      |                     |
| Tract collective efficacy           | 0.430***<br>(0.053)  | 0.473***<br>(0.059)  |                     | 0.472***<br>(0.059) |                   | 0.473***<br>(0.059)  |                     |
| ln(Tract Violent crime rate)        |                      |                      |                     |                     |                   |                      |                     |
| Interaction terms                   |                      |                      |                     |                     |                   |                      |                     |
| Black * Tract Disadvantage          | 0.053<br>(0.062)     |                      |                     |                     |                   |                      |                     |
| Black * Male                        |                      | 0.077<br>(0.080)     | 0.089<br>(0.115)    |                     |                   |                      |                     |
| Black * Age                         |                      |                      |                     | 0.043*<br>(0.021)   | -0.013<br>(0.027) |                      |                     |
| Black * Moved                       |                      |                      |                     |                     |                   | -0.194<br>(0.121)    | 0.078<br>(0.154)    |
| Constant                            | -0.133<br>(0.371)    | -0.360<br>(0.404)    | 0.303<br>(0.658)    | -0.092<br>(0.430)   | 0.180<br>(0.671)  | -0.426<br>(0.403)    | 0.272<br>(0.652)    |
| Fixed Effects                       |                      |                      | ✓                   |                     | ✓                 |                      | ✓                   |
| N: Neighborhood-level               | 178                  | 178                  | 89                  | 178                 | 89                | 178                  | 89                  |
| N: Individual-level                 | 1180                 | 1180                 | 674                 | 1180                | 674               | 1180                 | 674                 |

\*p < .05; \*\*p < .01; \*\*\*p < .001; two-tailed tests.

Notes: Models including an interaction for Black \* Tract Disadvantage are two-level linear multilevel models clustering on census tracts, and include a random slope term for Black (vs. white) respondent. All other models are single-level linear regression models with cluster robust standard errors. The following variables are z-score standardized: Tract concentrated disadvantage, tract collective efficacy, non-home collective efficacy, and non-home concentrated disadvantage.

APPENDIX: RACIAL SEGREGATION IN ACTIVITY SPACE

Appendix Table 9. Linear regression models for non-home exposure to violent crime with cluster robust standard errors and interactions.

|                                    | ln(Violent Crime) |         |         |         |         |          |         |
|------------------------------------|-------------------|---------|---------|---------|---------|----------|---------|
|                                    | Model 1           | Model 2 | Model 3 | Model 4 | Model 5 | Model 6  | Model 7 |
| ln(Block group population density) | -0.093*           | -0.095* | -0.085  | -0.094* | -0.079  | -0.093*  | -0.080  |
|                                    | (0.038)           | (0.043) | (0.091) | (0.043) | (0.091) | (0.043)  | (0.090) |
| Total non-home time (minutes)      | 0.000***          | 0.000** | 0.000   | 0.000** | 0.000   | 0.000*** | 0.000+  |
|                                    | (0.000)           | (0.000) | (0.000) | (0.000) | (0.000) | (0.000)  | (0.000) |
| Season                             |                   |         |         |         |         |          |         |
| Winter (December-February) (ref.)  |                   |         |         |         |         |          |         |
| Spring (March-May)                 | 0.040             | 0.050   | -0.053  | 0.051   | -0.050  | 0.050    | -0.042  |
|                                    | (0.065)           | (0.061) | (0.080) | (0.061) | (0.080) | (0.060)  | (0.081) |
| Summer (June-August)               | 0.013             | 0.028   | -0.026  | 0.028   | -0.025  | 0.028    | -0.026  |
|                                    | (0.062)           | (0.065) | (0.094) | (0.065) | (0.095) | (0.065)  | (0.094) |
| Autumn (September-November)        | 0.074             | 0.084   | 0.038   | 0.084   | 0.037   | 0.082    | 0.034   |
|                                    | (0.063)           | (0.061) | (0.085) | (0.061) | (0.085) | (0.061)  | (0.084) |
| Number of Weekend Days             |                   |         |         |         |         |          |         |
| 0                                  | 0.168             | 0.158   | 0.364+  | 0.161   | 0.365*  | 0.163    | 0.377*  |
|                                    | (0.162)           | (0.163) | (0.187) | (0.163) | (0.180) | (0.162)  | (0.182) |
| 1                                  | 0.201+            | 0.209+  | 0.052   | 0.206+  | 0.054   | 0.206+   | 0.053   |
|                                    | (0.121)           | (0.112) | (0.141) | (0.112) | (0.140) | (0.112)  | (0.146) |
| 2 (ref.)                           |                   |         |         |         |         |          |         |
| Family Controls                    |                   |         |         |         |         |          |         |
| Household size                     | -0.025+           | -0.025+ | -0.021  | -0.025+ | -0.021  | -0.025+  | -0.020  |
|                                    | (0.015)           | (0.014) | (0.019) | (0.014) | (0.019) | (0.014)  | (0.019) |
| Parent male                        | 0.067             | 0.082   | 0.006   | 0.082   | 0.010   | 0.083    | 0.010   |
|                                    | (0.068)           | (0.076) | (0.085) | (0.076) | (0.085) | (0.076)  | (0.083) |
| Parent age                         | -0.000            | -0.000  | -0.000  | -0.000  | -0.000  | -0.001   | -0.001  |
|                                    | (0.003)           | (0.003) | (0.004) | (0.003) | (0.004) | (0.003)  | (0.004) |
| Household income                   |                   |         |         |         |         |          |         |
| Under \$30,000 (ref.)              |                   |         |         |         |         |          |         |
| \$30,001 - \$60,000                | -0.072            | -0.078  | -0.042  | -0.076  | -0.044  | -0.080   | -0.048  |
|                                    | (0.063)           | (0.061) | (0.088) | (0.061) | (0.089) | (0.061)  | (0.088) |
| \$60,000 - \$150,000+              | -0.104            | -0.138+ | 0.048   | -0.137  | 0.050   | -0.136   | 0.049   |
|                                    | (0.080)           | (0.083) | (0.119) | (0.083) | (0.118) | (0.083)  | (0.118) |
| Parent education                   |                   |         |         |         |         |          |         |
| <High school (ref.)                |                   |         |         |         |         |          |         |
| High school                        | 0.072             | 0.063   | 0.045   | 0.066   | 0.048   | 0.064    | 0.060   |
|                                    | (0.112)           | (0.107) | (0.158) | (0.107) | (0.158) | (0.107)  | (0.157) |
| Some college                       | -0.040            | -0.053  | -0.031  | -0.053  | -0.032  | -0.052   | -0.020  |
|                                    | (0.106)           | (0.104) | (0.155) | (0.104) | (0.156) | (0.104)  | (0.156) |
| College degree                     | -0.108            | -0.145  | -0.109  | -0.144  | -0.107  | -0.144   | -0.088  |
|                                    | (0.121)           | (0.126) | (0.178) | (0.126) | (0.177) | (0.126)  | (0.176) |
| Graduate degree                    | -0.021            | -0.049  | -0.029  | -0.048  | -0.022  | -0.049   | -0.014  |
|                                    | (0.128)           | (0.131) | (0.183) | (0.131) | (0.185) | (0.131)  | (0.185) |
| Parent marital status              |                   |         |         |         |         |          |         |
| Married (ref.)                     |                   |         |         |         |         |          |         |
| Cohabiting                         | 0.064             | 0.062   | 0.173   | 0.063   | 0.163   | 0.056    | 0.143   |
|                                    | (0.086)           | (0.089) | (0.114) | (0.088) | (0.113) | (0.089)  | (0.113) |
| Single                             | -0.054            | -0.063  | 0.110   | -0.066  | 0.101   | -0.067   | 0.094   |
|                                    | (0.076)           | (0.068) | (0.095) | (0.068) | (0.095) | (0.068)  | (0.094) |
| Other                              | -0.001            | 0.025   | 0.107   | 0.026   | 0.105   | 0.022    | 0.096   |
|                                    | (0.071)           | (0.076) | (0.090) | (0.076) | (0.090) | (0.075)  | (0.086) |
| Residence owned (vs. rented)       | -0.098            | -0.082  | -0.114  | -0.084  | -0.123  | -0.085   | -0.125  |
|                                    | (0.066)           | (0.063) | (0.077) | (0.064) | (0.079) | (0.064)  | (0.076) |

APPENDIX: RACIAL SEGREGATION IN ACTIVITY SPACE

|                                     |                     |                     |                   |                     |                   |                     |                   |
|-------------------------------------|---------------------|---------------------|-------------------|---------------------|-------------------|---------------------|-------------------|
| Years lived in current neighborhood | 0.000<br>(0.003)    | 0.001<br>(0.002)    | 0.002<br>(0.004)  | 0.001<br>(0.002)    | 0.002<br>(0.004)  | 0.001<br>(0.002)    | 0.003<br>(0.004)  |
| Moved in the past two years         | 0.012<br>(0.065)    | 0.002<br>(0.072)    | 0.034<br>(0.097)  | 0.002<br>(0.072)    | 0.032<br>(0.098)  | 0.070<br>(0.129)    | 0.201<br>(0.185)  |
| Foreign born                        | -0.047<br>(0.158)   | -0.014<br>(0.137)   | -0.175<br>(0.263) | -0.020<br>(0.136)   | -0.193<br>(0.255) | -0.021<br>(0.139)   | -0.218<br>(0.257) |
| Age                                 | 0.034**<br>(0.012)  | 0.033**<br>(0.012)  | 0.014<br>(0.015)  | 0.041*<br>(0.017)   | 0.017<br>(0.021)  | 0.034**<br>(0.012)  | 0.015<br>(0.015)  |
| Male                                | -0.034<br>(0.044)   | -0.042<br>(0.071)   | -0.088<br>(0.092) | -0.029<br>(0.049)   | -0.013<br>(0.062) | -0.029<br>(0.049)   | -0.017<br>(0.062) |
| Respondent Black (vs. white)        | 0.238***<br>(0.066) | 0.237**<br>(0.074)  | 0.099<br>(0.089)  | 0.486<br>(0.295)    | 0.262<br>(0.396)  | 0.267***<br>(0.065) | 0.221*<br>(0.085) |
| Neighborhood-level measures         |                     |                     |                   |                     |                   |                     |                   |
| Tract concentrated disadvantage     | 0.148+<br>(0.076)   | 0.135*<br>(0.061)   |                   | 0.134*<br>(0.061)   |                   | 0.134*<br>(0.061)   |                   |
| Tract proportion Black              |                     |                     |                   |                     |                   |                     |                   |
| Tract collective efficacy           |                     |                     |                   |                     |                   |                     |                   |
| ln(Tract Violent crime rate)        | 0.590***<br>(0.040) | 0.586***<br>(0.062) |                   | 0.587***<br>(0.061) |                   | 0.585***<br>(0.062) |                   |
| Interaction terms                   |                     |                     |                   |                     |                   |                     |                   |
| Black * Tract Disadvantage          | -0.034<br>(0.069)   |                     |                   |                     |                   |                     |                   |
| Black * Male                        |                     | 0.025<br>(0.087)    | 0.148<br>(0.104)  |                     |                   |                     |                   |
| Black * Age                         |                     |                     |                   | -0.017<br>(0.021)   | -0.006<br>(0.028) |                     |                   |
| Black * Moved                       |                     |                     |                   |                     |                   | -0.106<br>(0.147)   | -0.276<br>(0.203) |
| Constant                            | -0.534<br>(0.407)   | -0.512<br>(0.454)   | 1.226<br>(0.896)  | -0.638<br>(0.470)   | 1.117<br>(0.930)  | -0.541<br>(0.450)   | 1.126<br>(0.878)  |
| Fixed Effects                       |                     |                     |                   |                     |                   |                     |                   |
| N: Neighborhood-level               | 178                 | 178                 | 89                | 178                 | 89                | 178                 | 89                |
| N: Individual-level                 | 1180                | 1180                | 674               | 1180                | 674               | 1180                | 674               |

\*p < .05; \*\*p < .01; \*\*\*p < .001; two-tailed tests.

Notes: Models including an interaction for Black \* Tract Disadvantage are two-level linear multilevel models clustering on census tracts, and include a random slope term for Black (vs. white) respondent. All other models are single-level linear regression models with cluster robust standard errors. The following variables are z-score standardized: Tract concentrated disadvantage, tract collective efficacy, non-home collective efficacy, and non-home concentrated disadvantage.

## Full Tables for Models Presented in Table 2: Non-Home Exposures Excluding School Time

Appendix Table 10. Linear regression models for non-home exposures with cluster robust standard errors, excluding school-time.

|                                    | Concentrated Disadvantage |                   |                   | Proportion Black  |                   |                   | Collective Efficacy |                    |                   | ln(Violent Crime)   |                    |                   |
|------------------------------------|---------------------------|-------------------|-------------------|-------------------|-------------------|-------------------|---------------------|--------------------|-------------------|---------------------|--------------------|-------------------|
|                                    | Model 1                   | Model 2           | Model 3           | Model 1           | Model 2           | Model 3           | Model 1             | Model 2            | Model 3           | Model 1             | Model 2            | Model 3           |
| ln(Block group population density) | -0.033<br>(0.039)         | -0.064<br>(0.053) | -0.033<br>(0.078) | 0.004<br>(0.009)  | 0.024*<br>(0.011) | -0.008<br>(0.016) | 0.019<br>(0.036)    | 0.039<br>(0.053)   | 0.013<br>(0.082)  | -0.096*<br>(0.044)  | -0.096+<br>(0.058) | -0.090<br>(0.090) |
| Total non-home time (minutes)      | -0.000<br>(0.000)         | -0.000<br>(0.000) | -0.000<br>(0.000) | 0.000<br>(0.000)  | -0.000<br>(0.000) | -0.000<br>(0.000) | 0.000<br>(0.000)    | -0.000<br>(0.000)  | -0.000<br>(0.000) | 0.000***<br>(0.000) | 0.000*<br>(0.000)  | 0.000+<br>(0.000) |
| Season                             |                           |                   |                   |                   |                   |                   | 0.000               | 0.000              | 0.000             |                     |                    |                   |
| Winter (December-February) (ref.)  |                           |                   |                   |                   |                   |                   |                     |                    |                   |                     |                    |                   |
| Spring (March-May)                 | 0.125*<br>(0.063)         | 0.020<br>(0.084)  | 0.016<br>(0.086)  | 0.012<br>(0.014)  | 0.013<br>(0.022)  | 0.004<br>(0.023)  | -0.052<br>(0.057)   | -0.036<br>(0.080)  | -0.003<br>(0.080) | 0.068<br>(0.061)    | -0.049<br>(0.072)  | -0.032<br>(0.082) |
| Summer (June-August)               | 0.008<br>(0.064)          | 0.008<br>(0.081)  | 0.002<br>(0.084)  | -0.002<br>(0.012) | -0.003<br>(0.017) | -0.006<br>(0.018) | 0.014<br>(0.066)    | -0.079<br>(0.083)  | -0.095<br>(0.088) | 0.042<br>(0.065)    | -0.010<br>(0.085)  | -0.016<br>(0.092) |
| Autumn (September-November)        | 0.000<br>(0.058)          | 0.035<br>(0.078)  | 0.033<br>(0.080)  | -0.012<br>(0.013) | -0.019<br>(0.018) | -0.015<br>(0.018) | -0.051<br>(0.063)   | -0.022<br>(0.080)  | -0.037<br>(0.086) | 0.071<br>(0.061)    | 0.023<br>(0.082)   | 0.003<br>(0.083)  |
| Number of Weekend Days             |                           |                   |                   |                   |                   |                   |                     |                    |                   |                     |                    |                   |
| 0                                  | -0.115<br>(0.195)         | -0.217<br>(0.218) | -0.185<br>(0.257) | -0.005<br>(0.033) | -0.042<br>(0.046) | -0.006<br>(0.051) | 0.239<br>(0.201)    | 0.189<br>(0.159)   | 0.183<br>(0.172)  | 0.119<br>(0.168)    | 0.262<br>(0.182)   | 0.322<br>(0.199)  |
| 1                                  | -0.053<br>(0.085)         | -0.011<br>(0.114) | -0.059<br>(0.128) | -0.012<br>(0.029) | -0.021<br>(0.041) | -0.036<br>(0.044) | -0.149<br>(0.128)   | -0.167<br>(0.143)  | -0.222<br>(0.142) | 0.178<br>(0.117)    | 0.129<br>(0.122)   | 0.004<br>(0.128)  |
| 2 (ref.)                           |                           |                   |                   |                   |                   |                   |                     |                    |                   |                     |                    |                   |
| Family Controls                    |                           |                   |                   |                   |                   |                   |                     |                    |                   |                     |                    |                   |
| Household size                     | 0.014<br>(0.016)          | 0.023<br>(0.019)  | 0.016<br>(0.022)  | 0.001<br>(0.004)  | 0.006<br>(0.005)  | 0.004<br>(0.005)  | -0.013<br>(0.016)   | -0.034+<br>(0.020) | -0.032<br>(0.021) | -0.028*<br>(0.014)  | -0.026<br>(0.018)  | -0.025<br>(0.020) |
| Parent male                        | 0.051<br>(0.061)          | 0.027<br>(0.088)  | 0.048<br>(0.095)  | 0.009<br>(0.013)  | 0.002<br>(0.019)  | -0.008<br>(0.020) | -0.006<br>(0.066)   | 0.028<br>(0.079)   | -0.007<br>(0.090) | 0.073<br>(0.080)    | 0.041<br>(0.101)   | -0.033<br>(0.092) |
| Parent age                         | 0.001<br>(0.003)          | 0.002<br>(0.004)  | 0.003<br>(0.004)  | 0.001<br>(0.001)  | 0.002<br>(0.001)  | 0.001<br>(0.001)  | 0.002<br>(0.003)    | 0.005<br>(0.004)   | 0.004<br>(0.004)  | -0.001<br>(0.003)   | 0.000<br>(0.004)   | -0.001<br>(0.004) |
| Household income                   |                           |                   |                   |                   |                   |                   |                     |                    |                   |                     |                    |                   |
| Under \$30,000 (ref.)              |                           |                   |                   |                   |                   |                   |                     |                    |                   |                     |                    |                   |
| \$30,001 - \$60,000                | -0.055                    | -0.061            | -0.062            | 0.010             | 0.005             | 0.023             | -0.027              | 0.030              | 0.071             | -0.066              | -0.061             | -0.045            |

APPENDIX: RACIAL SEGREGATION IN ACTIVITY SPACE

|                                     |          |         |         |          |          |          |           |           |           |          |         |         |
|-------------------------------------|----------|---------|---------|----------|----------|----------|-----------|-----------|-----------|----------|---------|---------|
|                                     | (0.070)  | (0.079) | (0.089) | (0.012)  | (0.016)  | (0.017)  | (0.062)   | (0.077)   | (0.086)   | (0.060)  | (0.083) | (0.083) |
| \$60,000 - \$150,000+               | -0.142+  | -0.124  | -0.040  | -0.004   | 0.001    | 0.028    | 0.083     | 0.150+    | 0.094     | -0.128   | -0.013  | 0.020   |
|                                     | (0.081)  | (0.096) | (0.107) | (0.015)  | (0.020)  | (0.023)  | (0.069)   | (0.081)   | (0.083)   | (0.080)  | (0.105) | (0.110) |
| Parent education                    |          |         |         |          |          |          |           |           |           |          |         |         |
| <High school (ref.)                 |          |         |         |          |          |          |           |           |           |          |         |         |
| High school                         | -0.061   | 0.125   | 0.109   | -0.017   | 0.038    | 0.032    | -0.008    | -0.075    | -0.109    | 0.029    | 0.025   | 0.012   |
|                                     | (0.137)  | (0.148) | (0.147) | (0.028)  | (0.032)  | (0.033)  | (0.088)   | (0.103)   | (0.110)   | (0.105)  | (0.147) | (0.155) |
| Some college                        | -0.297*  | -0.081  | -0.007  | -0.013   | 0.049    | 0.049    | 0.083     | 0.057     | -0.044    | -0.088   | -0.094  | -0.089  |
|                                     | (0.129)  | (0.151) | (0.147) | (0.027)  | (0.033)  | (0.034)  | (0.095)   | (0.116)   | (0.117)   | (0.102)  | (0.141) | (0.155) |
| College degree                      | -0.381*  | -0.059  | 0.013   | -0.030   | 0.034    | 0.020    | 0.153     | 0.040     | -0.069    | -0.188   | -0.190  | -0.161  |
|                                     | (0.152)  | (0.183) | (0.196) | (0.032)  | (0.041)  | (0.044)  | (0.105)   | (0.133)   | (0.139)   | (0.123)  | (0.174) | (0.177) |
| Graduate degree                     | -0.417** | -0.210  | -0.132  | -0.032   | 0.031    | 0.011    | 0.204+    | 0.155     | 0.026     | -0.082   | -0.081  | -0.060  |
|                                     | (0.154)  | (0.184) | (0.193) | (0.031)  | (0.038)  | (0.042)  | (0.114)   | (0.147)   | (0.152)   | (0.127)  | (0.173) | (0.183) |
| Parent marital status               |          |         |         |          |          |          |           |           |           |          |         |         |
| Married (ref.)                      |          |         |         |          |          |          |           |           |           |          |         |         |
| Cohabiting                          | 0.008    | 0.063   | 0.069   | 0.021    | 0.039    | 0.031    | -0.069    | -0.056    | -0.120    | 0.051    | 0.132   | 0.158   |
|                                     | (0.094)  | (0.114) | (0.120) | (0.022)  | (0.028)  | (0.028)  | (0.080)   | (0.100)   | (0.116)   | (0.089)  | (0.107) | (0.115) |
| Single                              | 0.096    | 0.219+  | 0.176   | 0.040*   | 0.054*   | 0.038    | -0.052    | -0.022    | -0.004    | -0.062   | 0.065   | 0.084   |
|                                     | (0.089)  | (0.114) | (0.114) | (0.019)  | (0.027)  | (0.027)  | (0.081)   | (0.099)   | (0.105)   | (0.068)  | (0.089) | (0.093) |
| Other                               | 0.022    | 0.005   | 0.009   | 0.007    | 0.010    | 0.022    | -0.112+   | -0.057    | -0.045    | 0.017    | 0.123   | 0.076   |
|                                     | (0.061)  | (0.081) | (0.080) | (0.014)  | (0.018)  | (0.019)  | (0.067)   | (0.089)   | (0.090)   | (0.075)  | (0.086) | (0.084) |
| Residence owned (vs. rented)        | -0.064   | 0.018   | -0.016  | -0.031*  | -0.025   | -0.033   | 0.104+    | 0.065     | 0.052     | -0.084   | -0.037  | -0.132+ |
|                                     | (0.069)  | (0.082) | (0.087) | (0.015)  | (0.019)  | (0.021)  | (0.060)   | (0.080)   | (0.082)   | (0.061)  | (0.078) | (0.077) |
| Years lived in current neighborhood | 0.002    | 0.003   | 0.004   | 0.001    | 0.000    | 0.000    | -0.002    | -0.004    | -0.005    | 0.001    | 0.001   | 0.003   |
|                                     | (0.002)  | (0.004) | (0.004) | (0.001)  | (0.001)  | (0.001)  | (0.002)   | (0.003)   | (0.004)   | (0.002)  | (0.003) | (0.004) |
| Moved in the past two years         | 0.026    | 0.090   | 0.128   | 0.022    | 0.023    | 0.025    | -0.063    | -0.137+   | -0.119    | 0.006    | -0.030  | -0.001  |
|                                     | (0.072)  | (0.097) | (0.097) | (0.014)  | (0.020)  | (0.020)  | (0.060)   | (0.074)   | (0.087)   | (0.070)  | (0.091) | (0.094) |
| Foreign born                        | -0.064   | -0.012  | 0.102   | -0.023   | -0.040   | -0.024   | -0.007    | -0.037    | -0.178    | -0.019   | -0.172  | -0.183  |
|                                     | (0.088)  | (0.134) | (0.121) | (0.029)  | (0.052)  | (0.049)  | (0.095)   | (0.131)   | (0.119)   | (0.139)  | (0.194) | (0.259) |
| Age                                 | -0.023+  | -0.025  | -0.027  | -0.004+  | -0.003   | -0.002   | -0.001    | -0.011    | 0.002     | 0.035**  | 0.009   | 0.015   |
|                                     | (0.012)  | (0.017) | (0.017) | (0.003)  | (0.004)  | (0.004)  | (0.013)   | (0.016)   | (0.016)   | (0.012)  | (0.015) | (0.014) |
| Male                                | -0.003   | -0.022  | 0.000   | -0.007   | -0.008   | -0.003   | -0.004    | -0.018    | -0.054    | -0.008   | 0.021   | 0.007   |
|                                     | (0.043)  | (0.058) | (0.056) | (0.009)  | (0.014)  | (0.015)  | (0.044)   | (0.062)   | (0.060)   | (0.048)  | (0.063) | (0.063) |
| Respondent Black (vs. white)        | 0.310*** | 0.250** | 0.218** | 0.111*** | 0.107*** | 0.107*** | -0.323*** | -0.364*** | -0.336*** | 0.262*** | 0.244** | 0.188*  |
|                                     | (0.064)  | (0.077) | (0.079) | (0.015)  | (0.017)  | (0.016)  | (0.063)   | (0.076)   | (0.082)   | (0.062)  | (0.073) | (0.076) |



## APPENDIX: RACIAL SEGREGATION IN ACTIVITY SPACE

|                                 |          |          |         |          |          |         |          |          |         |          |          |         |
|---------------------------------|----------|----------|---------|----------|----------|---------|----------|----------|---------|----------|----------|---------|
| Neighborhood-level measures     |          |          |         |          |          |         |          |          |         |          |          |         |
| Tract concentrated disadvantage | 0.406*** | 0.491*** |         | 0.003    | -0.017   |         | -0.069   | -0.047   |         | 0.140*   | 0.165*   |         |
|                                 | (0.037)  | (0.057)  |         | (0.009)  | (0.014)  |         | (0.043)  | (0.099)  |         | (0.062)  | (0.077)  |         |
| Tract proportion Black          |          |          |         | 0.402*** | 0.443*** |         |          |          |         |          |          |         |
|                                 |          |          |         | (0.034)  | (0.041)  |         |          |          |         |          |          |         |
| Tract collective efficacy       |          |          |         |          |          |         | 0.396*** | 0.380*** |         |          |          |         |
|                                 |          |          |         |          |          |         | (0.045)  | (0.075)  |         |          |          |         |
| ln(Tract Violent crime rate)    |          |          |         |          |          |         |          |          |         | 0.576*** | 0.658*** |         |
|                                 |          |          |         |          |          |         |          |          |         | (0.061)  | (0.056)  |         |
| Constant                        | 0.612    | 0.602    | 0.444   | 0.108    | -0.186   | 0.248   | -0.156   | -0.140   | -0.001  | -0.454   | -0.423   | 1.295   |
|                                 | (0.445)  | (0.619)  | (0.796) | (0.102)  | (0.131)  | (0.168) | (0.364)  | (0.521)  | (0.766) | (0.465)  | (0.632)  | (0.885) |
| Fixed Effects                   |          |          | ✓       |          |          | ✓       |          |          | ✓       |          |          | ✓       |
| N: Neighborhood-level           | 178      | 89       | 89      | 178      | 89       | 89      | 178      | 89       | 89      | 178      | 89       | 89      |
| N: Individual-level             | 1159     | 663      | 663     | 1159     | 663      | 663     | 1159     | 663      | 663     | 1159     | 663      | 663     |

\*p < .05; \*\*p < .01; \*\*\*p < .001; two-tailed tests.

Notes: The following variables are z-score standardized: Tract concentrated disadvantage, tract collective efficacy, non-home concentrated disadvantage, and non-home collective efficacy.

## Full Tables for Interaction Models Presented in Table 3: Non-Home Exposures Excluding School Time

Appendix Table 11. Linear regression models for non-home exposure to concentrated disadvantage with cluster robust standard errors and interactions, excluding school-time.

|                                    | Concentrated Disadvantage |                     |                   |                     |                   |                     |                   |
|------------------------------------|---------------------------|---------------------|-------------------|---------------------|-------------------|---------------------|-------------------|
|                                    | Model 1                   | Model 2             | Model 3           | Model 4             | Model 5           | Model 6             | Model 7           |
| ln(Block group population density) | -0.034<br>(0.034)         | -0.032<br>(0.040)   | -0.034<br>(0.079) | -0.033<br>(0.039)   | -0.033<br>(0.078) | -0.035<br>(0.039)   | -0.033<br>(0.077) |
| Total non-home time (minutes)      | -0.000<br>(0.000)         | -0.000<br>(0.000)   | -0.000<br>(0.000) | -0.000<br>(0.000)   | -0.000<br>(0.000) | -0.000<br>(0.000)   | -0.000<br>(0.000) |
| Season                             |                           |                     |                   |                     |                   |                     |                   |
| Winter (December-February) (ref.)  |                           |                     |                   |                     |                   |                     |                   |
| Spring (March-May)                 | 0.127*<br>(0.064)         | 0.125*<br>(0.063)   | 0.016<br>(0.086)  | 0.126*<br>(0.063)   | 0.016<br>(0.086)  | 0.125*<br>(0.063)   | 0.011<br>(0.085)  |
| Summer (June-August)               | 0.005<br>(0.060)          | 0.008<br>(0.064)    | 0.001<br>(0.084)  | 0.008<br>(0.064)    | 0.002<br>(0.084)  | 0.009<br>(0.064)    | 0.002<br>(0.084)  |
| Autumn (September-November)        | 0.006<br>(0.062)          | -0.000<br>(0.058)   | 0.033<br>(0.080)  | 0.000<br>(0.058)    | 0.033<br>(0.080)  | 0.002<br>(0.058)    | 0.036<br>(0.080)  |
| Number of Weekend Days             |                           |                     |                   |                     |                   |                     |                   |
| 0                                  | -0.096<br>(0.161)         | -0.115<br>(0.196)   | -0.186<br>(0.257) | -0.113<br>(0.195)   | -0.180<br>(0.261) | -0.122<br>(0.195)   | -0.196<br>(0.252) |
| 1                                  | -0.057<br>(0.121)         | -0.054<br>(0.084)   | -0.060<br>(0.128) | -0.055<br>(0.084)   | -0.059<br>(0.127) | -0.052<br>(0.084)   | -0.059<br>(0.128) |
| 2 (ref.)                           |                           |                     |                   |                     |                   |                     |                   |
| Family Controls                    |                           |                     |                   |                     |                   |                     |                   |
| Household size                     | 0.016<br>(0.015)          | 0.014<br>(0.016)    | 0.016<br>(0.022)  | 0.014<br>(0.016)    | 0.016<br>(0.022)  | 0.014<br>(0.016)    | 0.016<br>(0.022)  |
| Parent male                        | 0.048<br>(0.067)          | 0.051<br>(0.061)    | 0.048<br>(0.095)  | 0.052<br>(0.061)    | 0.049<br>(0.095)  | 0.050<br>(0.061)    | 0.049<br>(0.095)  |
| Parent age                         | 0.002<br>(0.003)          | 0.001<br>(0.003)    | 0.003<br>(0.004)  | 0.001<br>(0.003)    | 0.003<br>(0.004)  | 0.001<br>(0.003)    | 0.003<br>(0.004)  |
| Household income                   |                           |                     |                   |                     |                   |                     |                   |
| Under \$30,000 (ref.)              |                           |                     |                   |                     |                   |                     |                   |
| \$30,001 - \$60,000                | -0.072<br>(0.065)         | -0.056<br>(0.069)   | -0.062<br>(0.089) | -0.052<br>(0.070)   | -0.061<br>(0.090) | -0.054<br>(0.069)   | -0.061<br>(0.089) |
| \$60,000 - \$150,000+              | -0.120<br>(0.076)         | -0.142+<br>(0.081)  | -0.040<br>(0.107) | -0.141+<br>(0.080)  | -0.038<br>(0.108) | -0.145+<br>(0.081)  | -0.042<br>(0.107) |
| Parent education                   |                           |                     |                   |                     |                   |                     |                   |
| <High school (ref.)                |                           |                     |                   |                     |                   |                     |                   |
| High school                        | -0.055<br>(0.110)         | -0.060<br>(0.137)   | 0.108<br>(0.147)  | -0.059<br>(0.138)   | 0.109<br>(0.148)  | -0.061<br>(0.136)   | 0.102<br>(0.148)  |
| Some college                       | -0.280**<br>(0.104)       | -0.296*<br>(0.129)  | -0.007<br>(0.148) | -0.297*<br>(0.129)  | -0.008<br>(0.147) | -0.297*<br>(0.128)  | -0.012<br>(0.149) |
| College degree                     | -0.341**<br>(0.117)       | -0.381*<br>(0.152)  | 0.013<br>(0.196)  | -0.380*<br>(0.152)  | 0.014<br>(0.196)  | -0.383*<br>(0.151)  | 0.003<br>(0.197)  |
| Graduate degree                    | -0.366**<br>(0.124)       | -0.417**<br>(0.154) | -0.133<br>(0.193) | -0.417**<br>(0.154) | -0.133<br>(0.193) | -0.418**<br>(0.153) | -0.136<br>(0.194) |
| Parent marital status              |                           |                     |                   |                     |                   |                     |                   |
| Married (ref.)                     |                           |                     |                   |                     |                   |                     |                   |
| Cohabiting                         | -0.001<br>(0.085)         | 0.007<br>(0.093)    | 0.070<br>(0.122)  | 0.010<br>(0.093)    | 0.070<br>(0.121)  | 0.013<br>(0.093)    | 0.080<br>(0.122)  |
| Single                             | 0.100<br>(0.075)          | 0.095<br>(0.089)    | 0.177<br>(0.114)  | 0.094<br>(0.089)    | 0.173<br>(0.114)  | 0.100<br>(0.089)    | 0.181<br>(0.114)  |
| Other                              | 0.025<br>(0.075)          | 0.022<br>(0.089)    | 0.010<br>(0.114)  | 0.023<br>(0.089)    | 0.008<br>(0.114)  | 0.025<br>(0.089)    | 0.014<br>(0.114)  |

## APPENDIX: RACIAL SEGREGATION IN ACTIVITY SPACE

|                                     |          |          |         |          |         |          |         |
|-------------------------------------|----------|----------|---------|----------|---------|----------|---------|
|                                     | (0.070)  | (0.061)  | (0.081) | (0.061)  | (0.080) | (0.060)  | (0.080) |
| Residence owned (vs. rented)        | -0.075   | -0.064   | -0.015  | -0.066   | -0.019  | -0.061   | -0.013  |
|                                     | (0.066)  | (0.069)  | (0.086) | (0.068)  | (0.086) | (0.069)  | (0.087) |
| Years lived in current neighborhood | 0.002    | 0.002    | 0.004   | 0.002    | 0.004   | 0.001    | 0.003   |
|                                     | (0.002)  | (0.002)  | (0.004) | (0.002)  | (0.004) | (0.002)  | (0.004) |
| Moved in the past two years         | 0.024    | 0.026    | 0.128   | 0.026    | 0.129   | -0.055   | 0.025   |
|                                     | (0.064)  | (0.072)  | (0.097) | (0.072)  | (0.098) | (0.089)  | (0.132) |
| Foreign born                        | -0.048   | -0.066   | 0.104   | -0.069   | 0.101   | -0.058   | 0.117   |
|                                     | (0.153)  | (0.088)  | (0.122) | (0.088)  | (0.121) | (0.089)  | (0.124) |
| Age                                 | -0.023+  | -0.023+  | -0.027  | -0.017   | -0.022  | -0.024+  | -0.028  |
|                                     | (0.012)  | (0.012)  | (0.017) | (0.015)  | (0.022) | (0.012)  | (0.017) |
| Male                                | -0.008   | 0.010    | -0.009  | -0.003   | 0.000   | -0.003   | 0.003   |
|                                     | (0.043)  | (0.055)  | (0.077) | (0.043)  | (0.056) | (0.043)  | (0.056) |
| Respondent Black (vs. white)        | 0.331*** | 0.323*** | 0.209*  | 0.513    | 0.370   | 0.288*** | 0.187*  |
|                                     | (0.063)  | (0.073)  | (0.091) | (0.370)  | (0.564) | (0.068)  | (0.087) |
| Neighborhood-level measures         |          |          |         |          |         |          |         |
| Tract concentrated disadvantage     | 0.514*** | 0.406*** |         | 0.406*** |         | 0.407*** |         |
|                                     | (0.049)  | (0.037)  |         | (0.037)  |         | (0.037)  |         |
| Tract proportion Black              |          |          |         |          |         |          |         |
| Tract collective efficacy           |          |          |         |          |         |          |         |
| ln(Tract Violent crime rate)        |          |          |         |          |         |          |         |
| Interaction terms                   |          |          |         |          |         |          |         |
| Black * Tract Disadvantage          | -0.150*  |          |         |          |         |          |         |
|                                     | (0.059)  |          |         |          |         |          |         |
| Black * Male                        |          | -0.026   | 0.019   |          |         |          |         |
|                                     |          | (0.088)  | (0.111) |          |         |          |         |
| Black * Age                         |          |          |         | -0.014   | -0.011  |          |         |
|                                     |          |          |         | (0.024)  | (0.038) |          |         |
| Black * Moved                       |          |          |         |          |         | 0.128    | 0.169   |
|                                     |          |          |         |          |         | (0.117)  | (0.174) |
| Constant                            | 0.577    | 0.601    | 0.452   | 0.512    | 0.374   | 0.636    | 0.466   |
|                                     | (0.377)  | (0.453)  | (0.800) | (0.467)  | (0.785) | (0.445)  | (0.789) |
| Fixed Effects                       |          |          | ✓       |          | ✓       |          | ✓       |
| N: Neighborhood-level               | 178      | 178      | 89      | 178      | 89      | 178      | 89      |
| N: Individual-level                 | 1159     | 1159     | 663     | 1159     | 663     | 1159     | 663     |

\*p < .05; \*\*p < .01; \*\*\*p < .001; two-tailed tests.

Notes: Models including an interaction for Black \* Tract Disadvantage are two-level linear multilevel models clustering on census tracts, and include a random slope term for Black (vs. white) respondent. All other models are single-level linear regression models with cluster robust standard errors. The following variables are z-score standardized: Tract concentrated disadvantage, tract collective efficacy, non-home collective efficacy, and non-home concentrated disadvantage.

APPENDIX: RACIAL SEGREGATION IN ACTIVITY SPACE

Appendix Table 12. Linear regression models for non-home exposure to proportion Black with cluster robust standard errors and interactions, excluding school-time.

|                                     | Proportion Black   |                    |                   |                    |                    |                    |                   |
|-------------------------------------|--------------------|--------------------|-------------------|--------------------|--------------------|--------------------|-------------------|
|                                     | Model 1            | Model 2            | Model 3           | Model 4            | Model 5            | Model 6            | Model 7           |
| ln(Block group population density)  | -0.000<br>(0.008)  | 0.005<br>(0.009)   | -0.007<br>(0.016) | 0.004<br>(0.009)   | -0.008<br>(0.016)  | 0.004<br>(0.009)   | -0.008<br>(0.016) |
| Total non-home time (minutes)       | -0.000<br>(0.000)  | 0.000<br>(0.000)   | -0.000<br>(0.000) | -0.000<br>(0.000)  | -0.000<br>(0.000)  | -0.000<br>(0.000)  | -0.000<br>(0.000) |
| Season                              |                    |                    |                   |                    |                    |                    |                   |
| Winter (December-February) (ref.)   |                    |                    |                   |                    |                    |                    |                   |
| Spring (March-May)                  | 0.013<br>(0.013)   | 0.012<br>(0.014)   | 0.005<br>(0.022)  | 0.013<br>(0.014)   | 0.004<br>(0.022)   | 0.012<br>(0.014)   | 0.004<br>(0.023)  |
| Summer (June-August)                | -0.000<br>(0.013)  | -0.002<br>(0.012)  | -0.005<br>(0.018) | -0.002<br>(0.012)  | -0.005<br>(0.018)  | -0.002<br>(0.012)  | -0.005<br>(0.018) |
| Autumn (September-November)         | -0.010<br>(0.013)  | -0.013<br>(0.013)  | -0.015<br>(0.018) | -0.012<br>(0.013)  | -0.016<br>(0.018)  | -0.012<br>(0.013)  | -0.015<br>(0.018) |
| Number of Weekend Days              |                    |                    |                   |                    |                    |                    |                   |
| 0                                   | -0.008<br>(0.034)  | -0.004<br>(0.034)  | -0.006<br>(0.052) | -0.004<br>(0.033)  | -0.001<br>(0.051)  | -0.007<br>(0.034)  | -0.007<br>(0.051) |
| 1                                   | -0.020<br>(0.025)  | -0.012<br>(0.029)  | -0.036<br>(0.044) | -0.013<br>(0.029)  | -0.036<br>(0.044)  | -0.012<br>(0.029)  | -0.036<br>(0.044) |
| 2 (ref.)                            |                    |                    |                   |                    |                    |                    |                   |
| Family Controls                     |                    |                    |                   |                    |                    |                    |                   |
| Household size                      | 0.002<br>(0.003)   | 0.001<br>(0.004)   | 0.004<br>(0.005)  | 0.001<br>(0.004)   | 0.004<br>(0.005)   | 0.001<br>(0.004)   | 0.004<br>(0.005)  |
| Parent male                         | 0.008<br>(0.014)   | 0.009<br>(0.013)   | -0.007<br>(0.019) | 0.010<br>(0.013)   | -0.008<br>(0.020)  | 0.009<br>(0.013)   | -0.008<br>(0.020) |
| Parent age                          | 0.001<br>(0.001)   | 0.001<br>(0.001)   | 0.001<br>(0.001)  | 0.001<br>(0.001)   | 0.001<br>(0.001)   | 0.001<br>(0.001)   | 0.001<br>(0.001)  |
| Household income                    |                    |                    |                   |                    |                    |                    |                   |
| Under \$30,000 (ref.)               |                    |                    |                   |                    |                    |                    |                   |
| \$30,001 - \$60,000                 | 0.011<br>(0.013)   | 0.009<br>(0.012)   | 0.023<br>(0.017)  | 0.011<br>(0.012)   | 0.025<br>(0.017)   | 0.010<br>(0.012)   | 0.023<br>(0.017)  |
| \$60,000 - \$150,000+               | 0.001<br>(0.015)   | -0.005<br>(0.015)  | 0.028<br>(0.022)  | -0.004<br>(0.015)  | 0.030<br>(0.022)   | -0.005<br>(0.015)  | 0.028<br>(0.023)  |
| Parent education                    |                    |                    |                   |                    |                    |                    |                   |
| <High school (ref.)                 |                    |                    |                   |                    |                    |                    |                   |
| High school                         | -0.009<br>(0.023)  | -0.016<br>(0.028)  | 0.033<br>(0.033)  | -0.015<br>(0.028)  | 0.033<br>(0.034)   | -0.017<br>(0.027)  | 0.032<br>(0.033)  |
| Some college                        | -0.002<br>(0.022)  | -0.012<br>(0.027)  | 0.049<br>(0.034)  | -0.013<br>(0.027)  | 0.048<br>(0.033)   | -0.013<br>(0.027)  | 0.049<br>(0.034)  |
| College degree                      | -0.023<br>(0.025)  | -0.029<br>(0.032)  | 0.020<br>(0.044)  | -0.029<br>(0.032)  | 0.020<br>(0.044)   | -0.030<br>(0.032)  | 0.019<br>(0.044)  |
| Graduate degree                     | -0.027<br>(0.026)  | -0.031<br>(0.031)  | 0.013<br>(0.043)  | -0.031<br>(0.031)  | 0.011<br>(0.043)   | -0.032<br>(0.031)  | 0.011<br>(0.043)  |
| Parent marital status               |                    |                    |                   |                    |                    |                    |                   |
| Married (ref.)                      |                    |                    |                   |                    |                    |                    |                   |
| Cohabiting                          | 0.019<br>(0.018)   | 0.019<br>(0.022)   | 0.029<br>(0.028)  | 0.022<br>(0.022)   | 0.032<br>(0.027)   | 0.022<br>(0.022)   | 0.032<br>(0.029)  |
| Single                              | 0.041**<br>(0.016) | 0.040*<br>(0.019)  | 0.037<br>(0.027)  | 0.039*<br>(0.020)  | 0.035<br>(0.027)   | 0.041*<br>(0.019)  | 0.039<br>(0.027)  |
| Other                               | 0.014<br>(0.015)   | 0.007<br>(0.014)   | 0.021<br>(0.020)  | 0.008<br>(0.014)   | 0.021<br>(0.020)   | 0.008<br>(0.014)   | 0.022<br>(0.019)  |
| Residence owned (vs. rented)        | -0.033*<br>(0.014) | -0.031*<br>(0.015) | -0.034<br>(0.021) | -0.032*<br>(0.015) | -0.035+<br>(0.021) | -0.030*<br>(0.015) | -0.033<br>(0.021) |
| Years lived in current neighborhood | 0.001+<br>(0.001)  | 0.001<br>(0.001)   | 0.000<br>(0.000)  | 0.001<br>(0.001)   | 0.000<br>(0.000)   | 0.001<br>(0.001)   | 0.000<br>(0.000)  |

APPENDIX: RACIAL SEGREGATION IN ACTIVITY SPACE

|                                 |          |          |          |          |         |          |          |
|---------------------------------|----------|----------|----------|----------|---------|----------|----------|
|                                 | (0.001)  | (0.001)  | (0.001)  | (0.001)  | (0.001) | (0.001)  | (0.001)  |
| Moved in the past two years     | 0.026+   | 0.022    | 0.024    | 0.022    | 0.026   | 0.006    | 0.015    |
|                                 | (0.014)  | (0.014)  | (0.020)  | (0.014)  | (0.020) | (0.022)  | (0.033)  |
| Foreign born                    | -0.021   | -0.024   | -0.027   | -0.026   | -0.025  | -0.022   | -0.023   |
|                                 | (0.032)  | (0.028)  | (0.048)  | (0.029)  | (0.050) | (0.029)  | (0.049)  |
| Age                             | -0.003   | -0.004+  | -0.002   | 0.001    | 0.003   | -0.005+  | -0.002   |
|                                 | (0.003)  | (0.003)  | (0.004)  | (0.003)  | (0.004) | (0.003)  | (0.004)  |
| Male                            | -0.006   | 0.006    | 0.010    | -0.007   | -0.003  | -0.007   | -0.003   |
|                                 | (0.009)  | (0.012)  | (0.015)  | (0.009)  | (0.014) | (0.009)  | (0.015)  |
| Respondent Black (vs. white)    | 0.108*** | 0.124*** | 0.119*** | 0.262*** | 0.253*  | 0.106*** | 0.104*** |
|                                 | (0.015)  | (0.017)  | (0.017)  | (0.075)  | (0.119) | (0.016)  | (0.018)  |
| Neighborhood-level measures     |          |          |          |          |         |          |          |
| Tract concentrated disadvantage | 0.004    | 0.002    |          | 0.003    |         | 0.003    |          |
|                                 | (0.013)  | (0.009)  |          | (0.009)  |         | (0.009)  |          |
| Tract proportion Black          | 0.412*** | 0.401*** |          | 0.402*** |         | 0.403*** |          |
|                                 | (0.035)  | (0.034)  |          | (0.034)  |         | (0.034)  |          |
| Tract collective efficacy       |          |          |          |          |         |          |          |
| ln(Tract Violent crime rate)    |          |          |          |          |         |          |          |
| Interaction terms               |          |          |          |          |         |          |          |
| Black * Tract Disadvantage      | -0.001   |          |          |          |         |          |          |
|                                 | (0.014)  |          |          |          |         |          |          |
| Black * Male                    |          | -0.028   | -0.026   |          |         |          |          |
|                                 |          | (0.020)  | (0.025)  |          |         |          |          |
| Black * Age                     |          |          |          | -0.011*  | -0.010  |          |          |
|                                 |          |          |          | (0.005)  | (0.008) |          |          |
| Black * Moved                   |          |          |          |          |         | 0.026    | 0.015    |
|                                 |          |          |          |          |         | (0.027)  | (0.041)  |
| Constant                        | 0.109    | 0.097    | 0.237    | 0.034    | 0.181   | 0.113    | 0.250    |
|                                 | (0.083)  | (0.102)  | (0.170)  | (0.101)  | (0.174) | (0.101)  | (0.167)  |
| Fixed Effects                   |          |          |          |          |         |          |          |
| N: Neighborhood-level           | 178      | 178      | 89       | 178      | 89      | 178      | 89       |
| N: Individual-level             | 1159     | 1159     | 663      | 1159     | 663     | 1159     | 663      |

\*p < .05; \*\*p < .01; \*\*\*p < .001; two-tailed tests.

Notes: Models including an interaction for Black \* Tract Disadvantage are two-level linear multilevel models clustering on census tracts, and include a random slope term for Black (vs. white) respondent. All other models are single-level linear regression models with cluster robust standard errors. The following variables are z-score standardized: Tract concentrated disadvantage, tract collective efficacy, non-home collective efficacy, and non-home concentrated disadvantage.

APPENDIX: RACIAL SEGREGATION IN ACTIVITY SPACE

Appendix Table 13. Linear regression models for non-home exposure to collective efficacy with cluster robust standard errors and interactions, excluding school-time.

|                                     | Collective Efficacy |                    |                   |                    |                   |                    |                   |
|-------------------------------------|---------------------|--------------------|-------------------|--------------------|-------------------|--------------------|-------------------|
|                                     | Model 1             | Model 2            | Model 3           | Model 4            | Model 5           | Model 6            | Model 7           |
| ln(Block group population density)  | 0.020<br>(0.034)    | 0.019<br>(0.036)   | 0.013<br>(0.082)  | 0.019<br>(0.036)   | 0.012<br>(0.082)  | 0.021<br>(0.036)   | 0.013<br>(0.082)  |
| Total non-home time (minutes)       | 0.000<br>(0.000)    | 0.000<br>(0.000)   | -0.000<br>(0.000) | 0.000<br>(0.000)   | -0.000<br>(0.000) | 0.000<br>(0.000)   | -0.000<br>(0.000) |
| Season                              |                     |                    |                   |                    |                   |                    |                   |
| Winter (December-February) (ref.)   |                     |                    |                   |                    |                   |                    |                   |
| Spring (March-May)                  | -0.054<br>(0.063)   | -0.052<br>(0.057)  | -0.003<br>(0.079) | -0.052<br>(0.058)  | -0.004<br>(0.080) | -0.052<br>(0.057)  | -0.005<br>(0.080) |
| Summer (June-August)                | 0.009<br>(0.060)    | 0.014<br>(0.066)   | -0.095<br>(0.088) | 0.014<br>(0.067)   | -0.093<br>(0.088) | 0.013<br>(0.067)   | -0.095<br>(0.088) |
| Autumn (September-November)         | -0.054<br>(0.061)   | -0.051<br>(0.063)  | -0.037<br>(0.086) | -0.051<br>(0.063)  | -0.038<br>(0.086) | -0.053<br>(0.063)  | -0.035<br>(0.086) |
| Number of Weekend Days              |                     |                    |                   |                    |                   |                    |                   |
| 0                                   | 0.234<br>(0.160)    | 0.239<br>(0.201)   | 0.183<br>(0.172)  | 0.236<br>(0.200)   | 0.195<br>(0.175)  | 0.245<br>(0.200)   | 0.178<br>(0.174)  |
| 1                                   | -0.158<br>(0.120)   | -0.149<br>(0.128)  | -0.222<br>(0.142) | -0.146<br>(0.128)  | -0.222<br>(0.141) | -0.150<br>(0.128)  | -0.222<br>(0.142) |
| 2 (ref.)                            |                     |                    |                   |                    |                   |                    |                   |
| Family Controls                     |                     |                    |                   |                    |                   |                    |                   |
| Household size                      | -0.015<br>(0.014)   | -0.013<br>(0.016)  | -0.032<br>(0.021) | -0.013<br>(0.016)  | -0.032<br>(0.021) | -0.013<br>(0.016)  | -0.032<br>(0.021) |
| Parent male                         | -0.004<br>(0.068)   | -0.006<br>(0.066)  | -0.006<br>(0.091) | -0.007<br>(0.066)  | -0.005<br>(0.090) | -0.005<br>(0.066)  | -0.006<br>(0.090) |
| Parent age                          | 0.002<br>(0.003)    | 0.002<br>(0.003)   | 0.004<br>(0.004)  | 0.002<br>(0.003)   | 0.004<br>(0.004)  | 0.002<br>(0.003)   | 0.005<br>(0.004)  |
| Household income                    |                     |                    |                   |                    |                   |                    |                   |
| Under \$30,000 (ref.)               |                     |                    |                   |                    |                   |                    |                   |
| \$30,001 - \$60,000                 | -0.010<br>(0.065)   | -0.027<br>(0.062)  | 0.071<br>(0.086)  | -0.030<br>(0.063)  | 0.074<br>(0.086)  | -0.027<br>(0.063)  | 0.071<br>(0.086)  |
| \$60,000 - \$150,000+               | 0.073<br>(0.080)    | 0.083<br>(0.069)   | 0.094<br>(0.083)  | 0.082<br>(0.069)   | 0.098<br>(0.083)  | 0.086<br>(0.070)   | 0.093<br>(0.083)  |
| Parent education                    |                     |                    |                   |                    |                   |                    |                   |
| <High school (ref.)                 |                     |                    |                   |                    |                   |                    |                   |
| High school                         | -0.016<br>(0.110)   | -0.007<br>(0.089)  | -0.109<br>(0.109) | -0.010<br>(0.089)  | -0.108<br>(0.110) | -0.008<br>(0.089)  | -0.112<br>(0.108) |
| Some college                        | 0.065<br>(0.103)    | 0.083<br>(0.095)   | -0.044<br>(0.117) | 0.083<br>(0.095)   | -0.047<br>(0.117) | 0.084<br>(0.096)   | -0.047<br>(0.117) |
| College degree                      | 0.122<br>(0.117)    | 0.153<br>(0.105)   | -0.069<br>(0.139) | 0.151<br>(0.105)   | -0.068<br>(0.139) | 0.154<br>(0.106)   | -0.074<br>(0.138) |
| Graduate degree                     | 0.168<br>(0.124)    | 0.205+<br>(0.114)  | 0.026<br>(0.152)  | 0.204+<br>(0.114)  | 0.026<br>(0.152)  | 0.205+<br>(0.114)  | 0.024<br>(0.152)  |
| Parent marital status               |                     |                    |                   |                    |                   |                    |                   |
| Married (ref.)                      |                     |                    |                   |                    |                   |                    |                   |
| Cohabiting                          | -0.066<br>(0.082)   | -0.070<br>(0.081)  | -0.121<br>(0.117) | -0.072<br>(0.080)  | -0.118<br>(0.116) | -0.074<br>(0.079)  | -0.115<br>(0.117) |
| Single                              | -0.059<br>(0.073)   | -0.052<br>(0.081)  | -0.004<br>(0.106) | -0.050<br>(0.081)  | -0.011<br>(0.107) | -0.057<br>(0.081)  | -0.001<br>(0.106) |
| Other                               | -0.111<br>(0.069)   | -0.112+<br>(0.067) | -0.045<br>(0.089) | -0.112+<br>(0.067) | -0.046<br>(0.090) | -0.114+<br>(0.067) | -0.042<br>(0.090) |
| Residence owned (vs. rented)        | 0.113+<br>(0.065)   | 0.104+<br>(0.060)  | 0.052<br>(0.082)  | 0.106+<br>(0.060)  | 0.046<br>(0.082)  | 0.101+<br>(0.060)  | 0.053<br>(0.082)  |
| Years lived in current neighborhood | -0.002              | -0.002             | -0.005            | -0.002             | -0.005            | -0.002             | -0.005            |

APPENDIX: RACIAL SEGREGATION IN ACTIVITY SPACE

|                                 |           |           |           |          |         |           |           |
|---------------------------------|-----------|-----------|-----------|----------|---------|-----------|-----------|
|                                 | (0.002)   | (0.002)   | (0.003)   | (0.002)  | (0.004) | (0.002)   | (0.004)   |
| Moved in the past two years     | -0.063    | -0.063    | -0.119    | -0.063   | -0.117  | 0.016     | -0.166    |
|                                 | (0.063)   | (0.060)   | (0.087)   | (0.060)  | (0.086) | (0.096)   | (0.123)   |
| Foreign born                    | -0.032    | -0.008    | -0.178    | -0.002   | -0.180  | -0.014    | -0.171    |
|                                 | (0.153)   | (0.095)   | (0.123)   | (0.095)  | (0.117) | (0.098)   | (0.121)   |
| Age                             | -0.001    | -0.001    | 0.002     | -0.009   | 0.013   | -0.001    | 0.001     |
|                                 | (0.012)   | (0.013)   | (0.016)   | (0.016)  | (0.018) | (0.013)   | (0.016)   |
| Male                            | -0.007    | 0.002     | -0.053    | -0.004   | -0.054  | -0.004    | -0.053    |
|                                 | (0.043)   | (0.066)   | (0.083)   | (0.044)  | (0.061) | (0.044)   | (0.060)   |
| Respondent Black (vs. white)    | -0.341*** | -0.317*** | -0.334*** | -0.566+  | -0.009  | -0.302*** | -0.349*** |
|                                 | (0.062)   | (0.077)   | (0.096)   | (0.326)  | (0.410) | (0.068)   | (0.093)   |
| Neighborhood-level measures     |           |           |           |          |         |           |           |
| Tract concentrated disadvantage | -0.145*   | -0.070    |           | -0.069   |         | -0.070    |           |
|                                 | (0.065)   | (0.044)   |           | (0.043)  |         | (0.044)   |           |
| Tract proportion Black          |           |           |           |          |         |           |           |
| Tract collective efficacy       | 0.376***  | 0.396***  |           | 0.396*** |         | 0.396***  |           |
|                                 | (0.046)   | (0.046)   |           | (0.045)  |         | (0.045)   |           |
| ln(Tract Violent crime rate)    |           |           |           |          |         |           |           |
| Interaction terms               |           |           |           |          |         |           |           |
| Black * Tract Disadvantage      | 0.092     |           |           |          |         |           |           |
|                                 | (0.061)   |           |           |          |         |           |           |
| Black * Male                    |           | -0.013    | -0.002    |          |         |           |           |
|                                 |           | (0.089)   | (0.120)   |          |         |           |           |
| Black * Age                     |           |           |           | 0.017    | -0.023  |           |           |
|                                 |           |           |           | (0.022)  | (0.028) |           |           |
| Black * Moved                   |           |           |           |          |         | -0.126    | 0.076     |
|                                 |           |           |           |          |         | (0.123)   | (0.162)   |
| Constant                        | -0.113    | -0.162    | -0.002    | -0.038   | -0.151  | -0.180    | 0.009     |
|                                 | (0.376)   | (0.371)   | (0.770)   | (0.402)  | (0.770) | (0.366)   | (0.764)   |
| Fixed Effects                   |           |           | ✓         |          | ✓       |           | ✓         |
| N: Neighborhood-level           | 178       | 178       | 89        | 178      | 89      | 178       | 89        |
| N: Individual-level             | 1159      | 1159      | 663       | 1159     | 663     | 1159      | 663       |

\*p < .05; \*\*p < .01; \*\*\*p < .001; two-tailed tests.

Notes: Models including an interaction for Black \* Tract Disadvantage are two-level linear multilevel models clustering on census tracts, and include a random slope term for Black (vs. white) respondent. All other models are single-level linear regression models with cluster robust standard errors. The following variables are z-score standardized: Tract concentrated disadvantage, tract collective efficacy, non-home collective efficacy, and non-home concentrated disadvantage.

APPENDIX: RACIAL SEGREGATION IN ACTIVITY SPACE

Appendix Table 14. Linear regression models for non-home exposure to violent crime with cluster robust standard errors and interactions, excluding school-time.

|                                     | ln(Violent Crime) |          |         |         |         |          |         |
|-------------------------------------|-------------------|----------|---------|---------|---------|----------|---------|
|                                     | Model 1           | Model 2  | Model 3 | Model 4 | Model 5 | Model 6  | Model 7 |
| ln(Block group population density)  | -0.097*           | -0.097*  | -0.096  | -0.096* | -0.090  | -0.095*  | -0.091  |
|                                     | (0.038)           | (0.045)  | (0.090) | (0.044) | (0.090) | (0.044)  | (0.089) |
| Total non-home time (minutes)       | 0.000***          | 0.000*** | 0.000+  | 0.000** | 0.000+  | 0.000*** | 0.000+  |
|                                     | (0.000)           | (0.000)  | (0.000) | (0.000) | (0.000) | (0.000)  | (0.000) |
| Season                              |                   |          |         |         |         |          |         |
| Winter (December-February) (ref.)   |                   |          |         |         |         |          |         |
| Spring (March-May)                  | 0.058             | 0.068    | -0.035  | 0.069   | -0.032  | 0.068    | -0.025  |
|                                     | (0.065)           | (0.061)  | (0.082) | (0.061) | (0.082) | (0.061)  | (0.082) |
| Summer (June-August)                | 0.024             | 0.042    | -0.017  | 0.042   | -0.016  | 0.042    | -0.017  |
|                                     | (0.062)           | (0.065)  | (0.092) | (0.065) | (0.092) | (0.065)  | (0.092) |
| Autumn (September-November)         | 0.058             | 0.072    | 0.003   | 0.071   | 0.003   | 0.071    | -0.000  |
|                                     | (0.063)           | (0.061)  | (0.083) | (0.061) | (0.083) | (0.061)  | (0.082) |
| Number of Weekend Days              |                   |          |         |         |         |          |         |
| 0                                   | 0.130             | 0.117    | 0.321   | 0.120   | 0.323   | 0.121    | 0.336   |
|                                     | (0.163)           | (0.169)  | (0.209) | (0.169) | (0.201) | (0.168)  | (0.203) |
| 1                                   | 0.153             | 0.178    | 0.004   | 0.177   | 0.004   | 0.178    | 0.003   |
|                                     | (0.123)           | (0.117)  | (0.130) | (0.117) | (0.128) | (0.117)  | (0.132) |
| 2 (ref.)                            |                   |          |         |         |         |          |         |
| Family Controls                     |                   |          |         |         |         |          |         |
| Household size                      | -0.028+           | -0.028*  | -0.025  | -0.028* | -0.025  | -0.028*  | -0.024  |
|                                     | (0.015)           | (0.014)  | (0.019) | (0.014) | (0.020) | (0.014)  | (0.020) |
| Parent male                         | 0.053             | 0.073    | -0.038  | 0.074   | -0.033  | 0.073    | -0.033  |
|                                     | (0.069)           | (0.079)  | (0.092) | (0.080) | (0.092) | (0.079)  | (0.091) |
| Parent age                          | -0.001            | -0.001   | -0.000  | -0.001  | -0.001  | -0.001   | -0.001  |
|                                     | (0.003)           | (0.003)  | (0.004) | (0.003) | (0.004) | (0.003)  | (0.004) |
| Household income                    |                   |          |         |         |         |          |         |
| Under \$30,000 (ref.)               |                   |          |         |         |         |          |         |
| \$30,001 - \$60,000                 | -0.056            | -0.065   | -0.042  | -0.064  | -0.045  | -0.066   | -0.046  |
|                                     | (0.064)           | (0.060)  | (0.083) | (0.061) | (0.084) | (0.060)  | (0.083) |
| \$60,000 - \$150,000+               | -0.095            | -0.128   | 0.021   | -0.127  | 0.020   | -0.127   | 0.022   |
|                                     | (0.078)           | (0.080)  | (0.110) | (0.080) | (0.110) | (0.081)  | (0.110) |
| Parent education                    |                   |          |         |         |         |          |         |
| <High school (ref.)                 |                   |          |         |         |         |          |         |
| High school                         | 0.038             | 0.027    | 0.009   | 0.030   | 0.012   | 0.029    | 0.020   |
|                                     | (0.110)           | (0.105)  | (0.156) | (0.106) | (0.156) | (0.105)  | (0.155) |
| Some college                        | -0.077            | -0.089   | -0.090  | -0.088  | -0.089  | -0.088   | -0.081  |
|                                     | (0.104)           | (0.103)  | (0.156) | (0.103) | (0.156) | (0.103)  | (0.155) |
| College degree                      | -0.155            | -0.188   | -0.163  | -0.187  | -0.160  | -0.188   | -0.147  |
|                                     | (0.118)           | (0.124)  | (0.177) | (0.124) | (0.177) | (0.123)  | (0.176) |
| Graduate degree                     | -0.059            | -0.083   | -0.068  | -0.081  | -0.060  | -0.082   | -0.055  |
|                                     | (0.124)           | (0.127)  | (0.181) | (0.127) | (0.183) | (0.127)  | (0.183) |
| Parent marital status               |                   |          |         |         |         |          |         |
| Married (ref.)                      |                   |          |         |         |         |          |         |
| Cohabiting                          | 0.052             | 0.052    | 0.168   | 0.052   | 0.158   | 0.049    | 0.143   |
|                                     | (0.085)           | (0.089)  | (0.116) | (0.088) | (0.115) | (0.089)  | (0.114) |
| Single                              | -0.054            | -0.061   | 0.090   | -0.063  | 0.084   | -0.064   | 0.077   |
|                                     | (0.076)           | (0.068)  | (0.094) | (0.068) | (0.094) | (0.068)  | (0.093) |
| Other                               | -0.012            | 0.018    | 0.080   | 0.018   | 0.076   | 0.016    | 0.070   |
|                                     | (0.071)           | (0.075)  | (0.086) | (0.075) | (0.085) | (0.075)  | (0.082) |
| Residence owned (vs. rented)        | -0.104            | -0.084   | -0.126  | -0.085  | -0.132+ | -0.086   | -0.135+ |
|                                     | (0.066)           | (0.061)  | (0.077) | (0.061) | (0.079) | (0.061)  | (0.076) |
| Years lived in current neighborhood | 0.001             | 0.001    | 0.003   | 0.001   | 0.003   | 0.001    | 0.003   |



APPENDIX: RACIAL SEGREGATION IN ACTIVITY SPACE

|                                 |          |          |         |          |         |          |         |
|---------------------------------|----------|----------|---------|----------|---------|----------|---------|
|                                 | (0.003)  | (0.002)  | (0.004) | (0.002)  | (0.004) | (0.002)  | (0.004) |
| Moved in the past two years     | 0.014    | 0.006    | 0.001   | 0.006    | -0.001  | 0.035    | 0.134   |
|                                 | (0.065)  | (0.070)  | (0.093) | (0.070)  | (0.094) | (0.128)  | (0.175) |
| Foreign born                    | -0.064   | -0.018   | -0.166  | -0.022   | -0.183  | -0.022   | -0.203  |
|                                 | (0.156)  | (0.139)  | (0.267) | (0.138)  | (0.259) | (0.140)  | (0.260) |
| Age                             | 0.036**  | 0.035**  | 0.016   | 0.040*   | 0.016   | 0.035**  | 0.017   |
|                                 | (0.012)  | (0.012)  | (0.014) | (0.018)  | (0.021) | (0.012)  | (0.015) |
| Male                            | -0.012   | -0.023   | -0.067  | -0.008   | 0.007   | -0.008   | 0.004   |
|                                 | (0.044)  | (0.070)  | (0.091) | (0.048)  | (0.062) | (0.048)  | (0.062) |
| Respondent Black (vs. white)    | 0.242*** | 0.247**  | 0.116   | 0.420    | 0.203   | 0.270*** | 0.228** |
|                                 | (0.066)  | (0.075)  | (0.086) | (0.301)  | (0.403) | (0.066)  | (0.084) |
| Neighborhood-level measures     |          |          |         |          |         |          |         |
| Tract concentrated disadvantage | 0.131+   | 0.141*   |         | 0.140*   |         | 0.140*   |         |
|                                 | (0.076)  | (0.062)  |         | (0.062)  |         | (0.062)  |         |
| Tract proportion Black          |          |          |         |          |         |          |         |
| Tract collective efficacy       |          |          |         |          |         |          |         |
| ln(Tract Violent crime rate)    | 0.586*** | 0.577*** |         | 0.577*** |         | 0.576*** |         |
|                                 | (0.040)  | (0.062)  |         | (0.061)  |         | (0.062)  |         |
| Interaction terms               |          |          |         |          |         |          |         |
| Black * Tract Disadvantage      | -0.012   |          |         |          |         |          |         |
|                                 | (0.069)  |          |         |          |         |          |         |
| Black * Male                    |          | 0.032    | 0.148   |          |         |          |         |
|                                 |          | (0.085)  | (0.099) |          |         |          |         |
| Black * Age                     |          |          |         | -0.011   | -0.001  |          |         |
|                                 |          |          |         | (0.021)  | (0.029) |          |         |
| Black * Moved                   |          |          |         |          |         | -0.045   | -0.221  |
|                                 |          |          |         |          |         | (0.142)  | (0.192) |
| Constant                        | -0.448   | -0.441   | 1.359   | -0.532   | 1.287   | -0.462   | 1.265   |
|                                 | (0.407)  | (0.470)  | (0.888) | (0.492)  | (0.922) | (0.465)  | (0.870) |
| Fixed Effects                   |          |          |         |          |         |          |         |
| N: Neighborhood-level           | 178      | 178      | 89      | 178      | 89      | 178      | 89      |
| N: Individual-level             | 1159     | 1159     | 663     | 1159     | 663     | 1159     | 663     |

\*p < .05; \*\*p < .01; \*\*\*p < .001; two-tailed tests.

Notes: Models including an interaction for Black \* Tract Disadvantage are two-level linear multilevel models clustering on census tracts, and include a random slope term for Black (vs. white) respondent. All other models are single-level linear regression models with cluster robust standard errors. The following variables are z-score standardized: Tract concentrated disadvantage, tract collective efficacy, non-home collective efficacy, and non-home concentrated disadvantage.

## Full Tables for Models Presented in Table 2: Non-Home Exposure to Census Tract Features

Appendix Table 15. Linear regression models for non-home exposures based on census tracts with cluster robust standard errors.

|                                    | Concentrated Disadvantage |                    |                    | Proportion Black  |                    |                    | Collective Efficacy |                     |                     |
|------------------------------------|---------------------------|--------------------|--------------------|-------------------|--------------------|--------------------|---------------------|---------------------|---------------------|
|                                    | Model 1                   | Model 2            | Model 3            | Model 1           | Model 2            | Model 3            | Model 1             | Model 2             | Model 3             |
| ln(Block group population density) | -0.046<br>(0.037)         | -0.107*<br>(0.053) | -0.018<br>(0.070)  | 0.002<br>(0.008)  | 0.005<br>(0.011)   | -0.025+<br>(0.013) | 0.026<br>(0.034)    | 0.041<br>(0.051)    | -0.060<br>(0.052)   |
| Total non-home time (minutes)      | -0.000*<br>(0.000)        | -0.000*<br>(0.000) | -0.000+<br>(0.000) | 0.000<br>(0.000)  | 0.000<br>(0.000)   | -0.000<br>(0.000)  | 0.000+<br>(0.000)   | 0.000<br>(0.000)    | 0.000<br>(0.000)    |
| Season                             |                           |                    |                    |                   |                    |                    |                     |                     |                     |
| Winter (December-February) (ref.)  |                           |                    |                    |                   |                    |                    |                     |                     |                     |
| Spring (March-May)                 | 0.133*<br>(0.057)         | 0.058<br>(0.067)   | 0.115<br>(0.071)   | 0.023+<br>(0.014) | 0.019<br>(0.018)   | 0.023<br>(0.017)   | -0.064<br>(0.051)   | -0.013<br>(0.067)   | -0.053<br>(0.061)   |
| Summer (June-August)               | 0.117+<br>(0.067)         | 0.122<br>(0.085)   | 0.169+<br>(0.086)  | 0.018<br>(0.012)  | 0.018<br>(0.016)   | 0.027<br>(0.016)   | -0.098+<br>(0.056)  | -0.113<br>(0.072)   | -0.168*<br>(0.078)  |
| Autumn (September-November)        | 0.054<br>(0.063)          | 0.124<br>(0.081)   | 0.175*<br>(0.081)  | -0.005<br>(0.014) | -0.003<br>(0.018)  | 0.013<br>(0.019)   | -0.052<br>(0.053)   | -0.101<br>(0.069)   | -0.149*<br>(0.074)  |
| Number of Weekend Days             |                           |                    |                    |                   |                    |                    |                     |                     |                     |
| 0                                  | -0.135<br>(0.196)         | -0.122<br>(0.209)  | -0.099<br>(0.212)  | 0.022<br>(0.036)  | -0.016<br>(0.042)  | 0.025<br>(0.048)   | 0.004<br>(0.168)    | -0.124<br>(0.169)   | -0.007<br>(0.148)   |
| 1                                  | -0.002<br>(0.103)         | 0.044<br>(0.141)   | 0.052<br>(0.123)   | 0.015<br>(0.024)  | 0.016<br>(0.033)   | 0.013<br>(0.039)   | -0.059<br>(0.124)   | -0.042<br>(0.144)   | -0.124<br>(0.114)   |
| 2 (ref.)                           |                           |                    |                    |                   |                    |                    |                     |                     |                     |
| Family Controls                    |                           |                    |                    |                   |                    |                    |                     |                     |                     |
| Household size                     | 0.018<br>(0.017)          | 0.041*<br>(0.017)  | 0.035+<br>(0.018)  | 0.001<br>(0.004)  | 0.007<br>(0.005)   | 0.006<br>(0.005)   | -0.023<br>(0.015)   | -0.052**<br>(0.016) | -0.056**<br>(0.018) |
| Parent male                        | 0.019<br>(0.057)          | -0.033<br>(0.082)  | 0.001<br>(0.085)   | -0.010<br>(0.012) | -0.032*<br>(0.016) | -0.033*<br>(0.016) | 0.043<br>(0.052)    | 0.090<br>(0.073)    | 0.074<br>(0.075)    |
| Parent age                         | -0.001<br>(0.003)         | -0.002<br>(0.004)  | -0.001<br>(0.004)  | 0.001<br>(0.001)  | 0.001<br>(0.001)   | 0.001<br>(0.001)   | 0.004<br>(0.003)    | 0.006<br>(0.003)    | 0.005<br>(0.003)    |
| Household income                   |                           |                    |                    |                   |                    |                    |                     |                     |                     |
| Under \$30,000 (ref.)              |                           |                    |                    |                   |                    |                    |                     |                     |                     |
| \$30,001 - \$60,000                | -0.111                    | -0.150+            | -0.153+            | -0.013            | -0.026             | -0.026             | -0.002              | 0.070               | 0.104               |

APPENDIX: RACIAL SEGREGATION IN ACTIVITY SPACE

|                                     |          |         |         |          |          |          |          |         |         |
|-------------------------------------|----------|---------|---------|----------|----------|----------|----------|---------|---------|
|                                     | (0.073)  | (0.090) | (0.089) | (0.017)  | (0.018)  | (0.018)  | (0.064)  | (0.073) | (0.072) |
| \$60,000 - \$150,000+               | -0.216** | -0.165+ | -0.107  | -0.027   | -0.019   | -0.006   | 0.133*   | 0.128+  | 0.090   |
|                                     | (0.078)  | (0.088) | (0.093) | (0.018)  | (0.021)  | (0.022)  | (0.066)  | (0.072) | (0.069) |
| Parent education                    |          |         |         |          |          |          |          |         |         |
| <High school (ref.)                 |          |         |         |          |          |          |          |         |         |
| High school                         | 0.001    | 0.073   | 0.057   | -0.020   | 0.025    | 0.035    | 0.081    | 0.086   | 0.086   |
|                                     | (0.107)  | (0.130) | (0.126) | (0.024)  | (0.028)  | (0.029)  | (0.079)  | (0.102) | (0.101) |
| Some college                        | -0.135   | -0.027  | 0.061   | -0.018   | 0.027    | 0.040    | 0.175*   | 0.176   | 0.112   |
|                                     | (0.112)  | (0.149) | (0.151) | (0.025)  | (0.031)  | (0.033)  | (0.080)  | (0.107) | (0.108) |
| College degree                      | -0.260+  | -0.073  | 0.099   | -0.034   | 0.021    | 0.041    | 0.342*** | 0.250+  | 0.125   |
|                                     | (0.132)  | (0.179) | (0.179) | (0.029)  | (0.037)  | (0.038)  | (0.101)  | (0.136) | (0.133) |
| Graduate degree                     | -0.271*  | -0.115  | 0.050   | -0.023   | 0.038    | 0.052    | 0.284**  | 0.163   | 0.004   |
|                                     | (0.133)  | (0.178) | (0.180) | (0.028)  | (0.035)  | (0.039)  | (0.100)  | (0.131) | (0.124) |
| Parent marital status               |          |         |         |          |          |          |          |         |         |
| Married (ref.)                      |          |         |         |          |          |          |          |         |         |
| Cohabiting                          | 0.001    | 0.010   | 0.012   | -0.005   | -0.001   | -0.012   | -0.067   | -0.073  | -0.062  |
|                                     | (0.088)  | (0.104) | (0.104) | (0.020)  | (0.023)  | (0.023)  | (0.079)  | (0.094) | (0.101) |
| Single                              | 0.057    | 0.127   | 0.071   | 0.031    | 0.041    | 0.014    | -0.098   | -0.150+ | -0.056  |
|                                     | (0.089)  | (0.110) | (0.113) | (0.019)  | (0.027)  | (0.028)  | (0.068)  | (0.089) | (0.087) |
| Other                               | 0.018    | 0.036   | 0.052   | -0.002   | -0.001   | -0.006   | -0.185** | -0.217* | -0.198* |
|                                     | (0.069)  | (0.095) | (0.091) | (0.015)  | (0.020)  | (0.022)  | (0.065)  | (0.092) | (0.092) |
| Residence owned (vs. rented)        | -0.067   | -0.044  | -0.123  | -0.033*  | -0.022   | -0.038*  | -0.007   | -0.051  | 0.026   |
|                                     | (0.066)  | (0.083) | (0.081) | (0.014)  | (0.018)  | (0.019)  | (0.062)  | (0.077) | (0.070) |
| Years lived in current neighborhood | 0.002    | 0.002   | 0.005   | 0.001*   | 0.001    | 0.001*   | -0.000   | 0.003   | -0.001  |
|                                     | (0.002)  | (0.003) | (0.003) | (0.001)  | (0.001)  | (0.001)  | (0.002)  | (0.003) | (0.003) |
| Moved in the past two years         | 0.079    | 0.107   | 0.141+  | 0.025+   | 0.034+   | 0.039*   | -0.081   | -0.112  | -0.117  |
|                                     | (0.068)  | (0.085) | (0.083) | (0.013)  | (0.017)  | (0.018)  | (0.057)  | (0.068) | (0.072) |
| Foreign born                        | -0.166   | -0.250  | -0.084  | -0.069*  | -0.107+  | -0.072   | -0.054   | 0.028   | -0.208  |
|                                     | (0.131)  | (0.239) | (0.233) | (0.028)  | (0.058)  | (0.058)  | (0.139)  | (0.192) | (0.167) |
| Age                                 | -0.006   | 0.012   | -0.000  | -0.000   | 0.003    | 0.003    | 0.009    | -0.009  | 0.004   |
|                                     | (0.012)  | (0.016) | (0.015) | (0.003)  | (0.004)  | (0.003)  | (0.011)  | (0.011) | (0.011) |
| Male                                | -0.081+  | -0.129* | -0.127* | -0.014   | -0.022+  | -0.024*  | 0.082*   | 0.125*  | 0.063   |
|                                     | (0.043)  | (0.061) | (0.057) | (0.009)  | (0.013)  | (0.012)  | (0.040)  | (0.054) | (0.049) |
| Respondent Black (vs. white)        | 0.242*** | 0.205** | 0.182*  | 0.089*** | 0.089*** | 0.088*** | -0.186** | -0.157* | -0.135* |
|                                     | (0.064)  | (0.073) | (0.080) | (0.015)  | (0.017)  | (0.017)  | (0.060)  | (0.066) | (0.062) |

## APPENDIX: RACIAL SEGREGATION IN ACTIVITY SPACE

|                                 |          |          |         |          |          |         |          |          |         |
|---------------------------------|----------|----------|---------|----------|----------|---------|----------|----------|---------|
| Neighborhood-level measures     |          |          |         |          |          |         |          |          |         |
| Tract concentrated disadvantage | 0.430*** | 0.511*** |         | 0.015    | -0.005   |         | -0.066   | -0.050   |         |
|                                 | (0.040)  | (0.064)  |         | (0.011)  | (0.015)  |         | (0.044)  | (0.099)  |         |
| Tract proportion Black          |          |          |         | 0.356*** | 0.415*** |         |          |          |         |
|                                 |          |          |         | (0.038)  | (0.046)  |         |          |          |         |
| Tract collective efficacy       |          |          |         |          |          |         | 0.497*** | 0.539*** |         |
|                                 |          |          |         |          |          |         | (0.051)  | (0.094)  |         |
| ln(Tract Violent crime rate)    |          |          |         |          |          |         |          |          |         |
| Constant                        | 0.530    | 0.689    | 0.091   | 0.079    | -0.054   | 0.322*  | -0.542   | -0.459   | 0.313   |
|                                 | (0.395)  | (0.573)  | (0.730) | (0.089)  | (0.121)  | (0.131) | (0.332)  | (0.506)  | (0.497) |
| Fixed Effects                   |          |          | ✓       |          |          | ✓       |          |          | ✓       |
| N: Neighborhood-level           | 178      | 89       | 89      | 178      | 89       | 89      | 178      | 89       | 89      |
| N: Individual-level             | 1180     | 674      | 674     | 1180     | 674      | 674     | 1180     | 674      | 674     |

\*p < .05; \*\*p < .01; \*\*\*p < .001; two-tailed tests.

Notes: The following variables are z-score standardized: Tract concentrated disadvantage, tract collective efficacy, non-home concentrated disadvantage, and non-home collective efficacy.

## Full Tables for Interaction Models Presented in Table 3: Non-Home Exposure to Census Tract Features

Appendix Table 16. Linear regression models for non-home exposure to concentrated disadvantage based on census tracts with interactions and cluster robust standard errors.

|                                    | Concentrated Disadvantage |                     |                    |                     |                    |                     |                    |
|------------------------------------|---------------------------|---------------------|--------------------|---------------------|--------------------|---------------------|--------------------|
|                                    | Model 1                   | Model 2             | Model 3            | Model 4             | Model 5            | Model 6             | Model 7            |
| ln(Block group population density) | -0.038<br>(0.036)         | -0.044<br>(0.037)   | -0.014<br>(0.071)  | -0.046<br>(0.037)   | -0.019<br>(0.070)  | -0.048<br>(0.037)   | -0.018<br>(0.070)  |
| Total non-home time (minutes)      | -0.000+<br>(0.000)        | -0.000*<br>(0.000)  | -0.000+<br>(0.000) | -0.000*<br>(0.000)  | -0.000+<br>(0.000) | -0.000*<br>(0.000)  | -0.000+<br>(0.000) |
| Season                             |                           |                     |                    |                     |                    |                     |                    |
| Winter (December-February) (ref.)  |                           |                     |                    |                     |                    |                     |                    |
| Spring (March-May)                 | 0.157**<br>(0.061)        | 0.133*<br>(0.057)   | 0.117<br>(0.071)   | 0.134*<br>(0.058)   | 0.114<br>(0.071)   | 0.133*<br>(0.057)   | 0.115<br>(0.071)   |
| Summer (June-August)               | 0.130*<br>(0.058)         | 0.116+<br>(0.067)   | 0.170+<br>(0.087)  | 0.118+<br>(0.068)   | 0.171+<br>(0.086)  | 0.117+<br>(0.067)   | 0.169+<br>(0.086)  |
| Autumn (September-November)        | 0.087<br>(0.059)          | 0.052<br>(0.063)    | 0.175*<br>(0.082)  | 0.053<br>(0.063)    | 0.174*<br>(0.081)  | 0.056<br>(0.063)    | 0.175*<br>(0.081)  |
| Number of Weekend Days             |                           |                     |                    |                     |                    |                     |                    |
| 0                                  | -0.120<br>(0.151)         | -0.133<br>(0.196)   | -0.101<br>(0.214)  | -0.131<br>(0.196)   | -0.090<br>(0.214)  | -0.139<br>(0.196)   | -0.098<br>(0.213)  |
| 1                                  | 0.006<br>(0.113)          | -0.002<br>(0.103)   | 0.053<br>(0.123)   | -0.007<br>(0.103)   | 0.050<br>(0.123)   | 0.001<br>(0.103)    | 0.052<br>(0.123)   |
| 2 (ref.)                           |                           |                     |                    |                     |                    |                     |                    |
| Family Controls                    |                           |                     |                    |                     |                    |                     |                    |
| Household size                     | 0.018<br>(0.014)          | 0.018<br>(0.017)    | 0.035+<br>(0.018)  | 0.018<br>(0.017)    | 0.035+<br>(0.018)  | 0.018<br>(0.017)    | 0.035+<br>(0.018)  |
| Parent male                        | 0.025<br>(0.064)          | 0.018<br>(0.057)    | 0.005<br>(0.085)   | 0.020<br>(0.057)    | 0.002<br>(0.085)   | 0.018<br>(0.057)    | 0.001<br>(0.085)   |
| Parent age                         | -0.001<br>(0.003)         | -0.001<br>(0.003)   | -0.001<br>(0.004)  | -0.001<br>(0.003)   | -0.001<br>(0.004)  | -0.001<br>(0.003)   | -0.001<br>(0.004)  |
| Household income                   |                           |                     |                    |                     |                    |                     |                    |
| Under \$30,000 (ref.)              |                           |                     |                    |                     |                    |                     |                    |
| \$30,001 - \$60,000                | -0.135*<br>(0.062)        | -0.114<br>(0.073)   | -0.155+<br>(0.088) | -0.106<br>(0.073)   | -0.150+<br>(0.089) | -0.110<br>(0.073)   | -0.154+<br>(0.088) |
| \$60,000 - \$150,000+              | -0.169*<br>(0.071)        | -0.217**<br>(0.078) | -0.107<br>(0.091)  | -0.214**<br>(0.078) | -0.103<br>(0.093)  | -0.219**<br>(0.079) | -0.107<br>(0.093)  |
| Parent education                   |                           |                     |                    |                     |                    |                     |                    |
| <High school (ref.)                |                           |                     |                    |                     |                    |                     |                    |
| High school                        | 0.028<br>(0.105)          | 0.004<br>(0.108)    | 0.059<br>(0.127)   | 0.005<br>(0.107)    | 0.057<br>(0.127)   | 0.002<br>(0.107)    | 0.058<br>(0.125)   |
| Some college                       | -0.083<br>(0.098)         | -0.134<br>(0.112)   | 0.061<br>(0.151)   | -0.135<br>(0.111)   | 0.057<br>(0.152)   | -0.136<br>(0.111)   | 0.061<br>(0.151)   |
| College degree                     | -0.145<br>(0.111)         | -0.259+<br>(0.133)  | 0.101<br>(0.180)   | -0.258+<br>(0.132)  | 0.099<br>(0.179)   | -0.262*<br>(0.131)  | 0.101<br>(0.179)   |
| Graduate degree                    | -0.140<br>(0.118)         | -0.270*<br>(0.134)  | 0.055<br>(0.181)   | -0.270*<br>(0.133)  | 0.048<br>(0.181)   | -0.271*<br>(0.133)  | 0.050<br>(0.180)   |
| Parent marital status              |                           |                     |                    |                     |                    |                     |                    |
| Married (ref.)                     |                           |                     |                    |                     |                    |                     |                    |
| Cohabiting                         | -0.003<br>(0.081)         | -0.004<br>(0.088)   | 0.004<br>(0.106)   | 0.005<br>(0.087)    | 0.015<br>(0.103)   | 0.006<br>(0.088)    | 0.011<br>(0.106)   |
| Single                             | 0.045<br>(0.073)          | 0.055<br>(0.088)    | 0.067<br>(0.113)   | 0.053<br>(0.088)    | 0.065<br>(0.114)   | 0.061<br>(0.088)    | 0.071<br>(0.112)   |

## APPENDIX: RACIAL SEGREGATION IN ACTIVITY SPACE

|                                     |                     |                     |                   |                     |                    |                     |                    |
|-------------------------------------|---------------------|---------------------|-------------------|---------------------|--------------------|---------------------|--------------------|
| Other                               | 0.039<br>(0.066)    | 0.017<br>(0.069)    | 0.051<br>(0.093)  | 0.019<br>(0.068)    | 0.051<br>(0.091)   | 0.021<br>(0.068)    | 0.051<br>(0.091)   |
| Residence owned (vs. rented)        | -0.097<br>(0.063)   | -0.067<br>(0.066)   | -0.129<br>(0.082) | -0.069<br>(0.066)   | -0.130<br>(0.082)  | -0.064<br>(0.066)   | -0.124<br>(0.081)  |
| Years lived in current neighborhood | 0.003<br>(0.002)    | 0.002<br>(0.002)    | 0.005<br>(0.003)  | 0.002<br>(0.002)    | 0.004<br>(0.003)   | 0.002<br>(0.002)    | 0.005<br>(0.003)   |
| Moved in the past two years         | 0.084<br>(0.061)    | 0.080<br>(0.068)    | 0.139+<br>(0.083) | 0.079<br>(0.068)    | 0.143+<br>(0.084)  | 0.002<br>(0.091)    | 0.155<br>(0.122)   |
| Foreign born                        | -0.136<br>(0.147)   | -0.170<br>(0.131)   | -0.096<br>(0.233) | -0.174<br>(0.129)   | -0.086<br>(0.232)  | -0.160<br>(0.129)   | -0.086<br>(0.234)  |
| Age                                 | -0.005<br>(0.011)   | -0.006<br>(0.012)   | -0.000<br>(0.015) | 0.007<br>(0.014)    | 0.011<br>(0.017)   | -0.007<br>(0.012)   | 0.000<br>(0.015)   |
| Male                                | -0.091*<br>(0.041)  | -0.038<br>(0.055)   | -0.071<br>(0.071) | -0.081+<br>(0.043)  | -0.126*<br>(0.057) | -0.082+<br>(0.043)  | -0.127*<br>(0.058) |
| Respondent Black (vs. white)        | 0.199**<br>(0.071)  | 0.241**<br>(0.075)  | 0.234*<br>(0.099) | 0.675*<br>(0.310)   | 0.519<br>(0.460)   | 0.220**<br>(0.069)  | 0.184*<br>(0.090)  |
| Neighborhood-level measures         |                     |                     |                   |                     |                    |                     |                    |
| Tract concentrated disadvantage     | 0.520***<br>(0.053) | 0.428***<br>(0.039) |                   | 0.430***<br>(0.040) |                    | 0.431***<br>(0.040) |                    |
| Tract proportion Black              |                     |                     |                   |                     |                    |                     |                    |
| Tract collective efficacy           |                     |                     |                   |                     |                    |                     |                    |
| ln(Tract Violent crime rate)        |                     |                     |                   |                     |                    |                     |                    |
| Interaction terms                   |                     |                     |                   |                     |                    |                     |                    |
| Black * Tract Disadvantage          | -0.116+<br>(0.064)  |                     |                   |                     |                    |                     |                    |
| Black * Male                        |                     | -0.090<br>(0.075)   | -0.110<br>(0.097) |                     |                    |                     |                    |
| Black * Age                         |                     |                     |                   | -0.028<br>(0.021)   | -0.023<br>(0.031)  |                     |                    |
| Black * Moved                       |                     |                     |                   |                     |                    | 0.120<br>(0.121)    | -0.024<br>(0.151)  |
| Constant                            | -0.109<br>(0.406)   | -0.006<br>(0.435)   | 0.057<br>(0.716)  | 0.375<br>(0.417)    | -0.053<br>(0.701)  | 0.598<br>(0.397)    | 0.098<br>(0.711)   |
| N: Neighborhood-level               | 178                 | 178                 | 89                | 178                 | 89                 | 178                 | 89                 |
| N: Individual-level                 | 1180                | 1180                | 674               | 1180                | 674                | 1180                | 674                |

\*p < .05; \*\*p < .01; \*\*\*p < .001; two-tailed tests.

Notes: Models including an interaction for Black \* Tract Disadvantage are two-level linear multilevel models clustering on census tracts, and include a random slope term for Black (vs. white) respondent. All other models are single-level linear regression models with cluster robust standard errors. The following variables are z-score standardized: Tract concentrated disadvantage, tract collective efficacy, non-home collective efficacy, and non-home concentrated disadvantage.

# APPENDIX: RACIAL SEGREGATION IN ACTIVITY SPACE

Appendix Table 17. Linear regression models for non-home exposure to proportion Black based on census tracts with interactions and cluster robust standard errors.

|                                     | Proportion Black    |                    |                    |                    |                    |                    |                    |
|-------------------------------------|---------------------|--------------------|--------------------|--------------------|--------------------|--------------------|--------------------|
|                                     | Model 1             | Model 2            | Model 3            | Model 4            | Model 5            | Model 6            | Model 7            |
| ln(Block group population density)  | -0.002<br>(0.008)   | 0.003<br>(0.008)   | -0.024+<br>(0.013) | 0.003<br>(0.008)   | -0.025+<br>(0.013) | 0.002<br>(0.008)   | -0.025+<br>(0.013) |
| Total non-home time (minutes)       | 0.000<br>(0.000)    | 0.000<br>(0.000)   | -0.000<br>(0.000)  | 0.000<br>(0.000)   | -0.000<br>(0.000)  | 0.000<br>(0.000)   | -0.000<br>(0.000)  |
| Season                              |                     |                    |                    |                    |                    |                    |                    |
| Winter (December-February) (ref.)   |                     |                    |                    |                    |                    |                    |                    |
| Spring (March-May)                  | 0.024+<br>(0.014)   | 0.023+<br>(0.013)  | 0.023<br>(0.017)   | 0.023+<br>(0.014)  | 0.023<br>(0.017)   | 0.023+<br>(0.014)  | 0.023<br>(0.017)   |
| Summer (June-August)                | 0.022+<br>(0.013)   | 0.018<br>(0.012)   | 0.027+<br>(0.016)  | 0.018<br>(0.012)   | 0.028+<br>(0.016)  | 0.018<br>(0.012)   | 0.027<br>(0.016)   |
| Autumn (September-November)         | -0.001<br>(0.013)   | -0.005<br>(0.014)  | 0.013<br>(0.019)   | -0.005<br>(0.013)  | 0.013<br>(0.019)   | -0.005<br>(0.014)  | 0.013<br>(0.019)   |
| Number of Weekend Days              |                     |                    |                    |                    |                    |                    |                    |
| 0                                   | 0.022<br>(0.034)    | 0.023<br>(0.036)   | 0.025<br>(0.048)   | 0.023<br>(0.036)   | 0.027<br>(0.048)   | 0.021<br>(0.036)   | 0.025<br>(0.048)   |
| 1                                   | 0.009<br>(0.025)    | 0.015<br>(0.024)   | 0.013<br>(0.039)   | 0.014<br>(0.025)   | 0.013<br>(0.039)   | 0.016<br>(0.024)   | 0.013<br>(0.039)   |
| 2 (ref.)                            |                     |                    |                    |                    |                    |                    |                    |
| Family Controls                     |                     |                    |                    |                    |                    |                    |                    |
| Household size                      | 0.002<br>(0.003)    | 0.001<br>(0.004)   | 0.006<br>(0.005)   | 0.001<br>(0.004)   | 0.006<br>(0.005)   | 0.001<br>(0.004)   | 0.006<br>(0.005)   |
| Parent male                         | -0.010<br>(0.014)   | -0.010<br>(0.012)  | -0.032+<br>(0.016) | -0.010<br>(0.012)  | -0.032+<br>(0.016) | -0.010<br>(0.012)  | -0.033*<br>(0.016) |
| Parent age                          | 0.001<br>(0.001)    | 0.001<br>(0.001)   | 0.001<br>(0.001)   | 0.001<br>(0.001)   | 0.001<br>(0.001)   | 0.001<br>(0.001)   | 0.001<br>(0.001)   |
| Household income                    |                     |                    |                    |                    |                    |                    |                    |
| Under \$30,000 (ref.)               |                     |                    |                    |                    |                    |                    |                    |
| \$30,001 - \$60,000                 | -0.014<br>(0.015)   | -0.013<br>(0.017)  | -0.027<br>(0.018)  | -0.012<br>(0.017)  | -0.026<br>(0.018)  | -0.013<br>(0.017)  | -0.026<br>(0.018)  |
| \$60,000 - \$150,000+               | -0.021<br>(0.016)   | -0.027<br>(0.018)  | -0.006<br>(0.022)  | -0.026<br>(0.017)  | -0.005<br>(0.022)  | -0.027<br>(0.018)  | -0.006<br>(0.022)  |
| Parent education                    |                     |                    |                    |                    |                    |                    |                    |
| <High school (ref.)                 |                     |                    |                    |                    |                    |                    |                    |
| High school                         | -0.008<br>(0.023)   | -0.020<br>(0.024)  | 0.036<br>(0.029)   | -0.019<br>(0.024)  | 0.035<br>(0.029)   | -0.020<br>(0.024)  | 0.035<br>(0.029)   |
| Some college                        | -0.007<br>(0.022)   | -0.018<br>(0.025)  | 0.040<br>(0.033)   | -0.018<br>(0.025)  | 0.039<br>(0.033)   | -0.018<br>(0.025)  | 0.040<br>(0.033)   |
| College degree                      | -0.020<br>(0.025)   | -0.034<br>(0.029)  | 0.042<br>(0.038)   | -0.033<br>(0.029)  | 0.041<br>(0.038)   | -0.034<br>(0.029)  | 0.041<br>(0.038)   |
| Graduate degree                     | -0.009<br>(0.026)   | -0.022<br>(0.028)  | 0.053<br>(0.039)   | -0.022<br>(0.028)  | 0.052<br>(0.039)   | -0.023<br>(0.028)  | 0.052<br>(0.039)   |
| Parent marital status               |                     |                    |                    |                    |                    |                    |                    |
| Married (ref.)                      |                     |                    |                    |                    |                    |                    |                    |
| Cohabiting                          | -0.007<br>(0.018)   | -0.006<br>(0.021)  | -0.014<br>(0.023)  | -0.005<br>(0.020)  | -0.012<br>(0.023)  | -0.004<br>(0.020)  | -0.012<br>(0.023)  |
| Single                              | 0.024<br>(0.016)    | 0.031<br>(0.019)   | 0.014<br>(0.028)   | 0.030<br>(0.019)   | 0.013<br>(0.028)   | 0.032<br>(0.019)   | 0.014<br>(0.028)   |
| Other                               | 0.003<br>(0.015)    | -0.002<br>(0.015)  | -0.006<br>(0.022)  | -0.002<br>(0.015)  | -0.007<br>(0.022)  | -0.001<br>(0.015)  | -0.006<br>(0.022)  |
| Residence owned (vs. rented)        | -0.036**<br>(0.014) | -0.033*<br>(0.014) | -0.039*<br>(0.018) | -0.033*<br>(0.014) | -0.040*<br>(0.019) | -0.032*<br>(0.014) | -0.038*<br>(0.019) |
| Years lived in current neighborhood | 0.001*<br>(0.001)   | 0.001*<br>(0.001)  | 0.001*<br>(0.001)  | 0.001*<br>(0.001)  | 0.001*<br>(0.001)  | 0.001+<br>(0.001)  | 0.001*<br>(0.001)  |

APPENDIX: RACIAL SEGREGATION IN ACTIVITY SPACE

|                                 |          |          |          |          |         |          |          |
|---------------------------------|----------|----------|----------|----------|---------|----------|----------|
|                                 | (0.001)  | (0.001)  | (0.001)  | (0.001)  | (0.001) | (0.001)  | (0.001)  |
| Moved in the past two years     | 0.029*   | 0.025+   | 0.039*   | 0.025+   | 0.040*  | 0.006    | 0.037    |
|                                 | (0.014)  | (0.013)  | (0.018)  | (0.013)  | (0.018) | (0.018)  | (0.025)  |
| Foreign born                    | -0.067*  | -0.070*  | -0.074   | -0.071*  | -0.073  | -0.068*  | -0.072   |
|                                 | (0.033)  | (0.028)  | (0.057)  | (0.028)  | (0.058) | (0.028)  | (0.058)  |
| Age                             | 0.001    | -0.000   | 0.003    | 0.003    | 0.005   | -0.000   | 0.003    |
|                                 | (0.003)  | (0.003)  | (0.003)  | (0.003)  | (0.004) | (0.003)  | (0.003)  |
| Male                            | -0.016+  | -0.006   | -0.016   | -0.014   | -0.024* | -0.014   | -0.024+  |
|                                 | (0.009)  | (0.011)  | (0.015)  | (0.009)  | (0.012) | (0.009)  | (0.012)  |
| Respondent Black (vs. white)    | 0.087*** | 0.097*** | 0.096*** | 0.189**  | 0.154   | 0.084*** | 0.088*** |
|                                 | (0.015)  | (0.018)  | (0.020)  | (0.072)  | (0.110) | (0.016)  | (0.019)  |
| Neighborhood-level measures     |          |          |          |          |         |          |          |
| Tract concentrated disadvantage | 0.009    | 0.015    |          | 0.015    |         | 0.015    |          |
|                                 | (0.014)  | (0.011)  |          | (0.011)  |         | (0.011)  |          |
| Tract proportion Black          | 0.381*** | 0.356*** |          | 0.356*** |         | 0.356*** |          |
|                                 | (0.037)  | (0.038)  |          | (0.038)  |         | (0.038)  |          |
| Tract collective efficacy       |          |          |          |          |         |          |          |
| ln(Tract Violent crime rate)    |          |          |          |          |         |          |          |
| Interaction terms               |          |          |          |          |         |          |          |
| Black * Tract Disadvantage      | 0.003    |          |          |          |         |          |          |
|                                 | (0.014)  |          |          |          |         |          |          |
| Black * Male                    |          | -0.016   | -0.016   |          |         |          |          |
|                                 |          | (0.018)  | (0.022)  |          |         |          |          |
| Black * Age                     |          |          |          | -0.007   | -0.005  |          |          |
|                                 |          |          |          | (0.005)  | (0.008) |          |          |
| Black * Moved                   |          |          |          |          |         | 0.030    | 0.003    |
|                                 |          |          |          |          |         | (0.026)  | (0.034)  |
| Constant                        | 0.077    | 0.079    | 0.301*   | 0.038    | 0.277*  | 0.089    | 0.307*   |
|                                 | (0.087)  | (0.089)  | (0.129)  | (0.089)  | (0.130) | (0.088)  | (0.127)  |
| N: Neighborhood-level           | 178      | 178      | 89       | 178      | 89      | 178      | 89       |
| N: Individual-level             | 1180     | 1180     | 674      | 1180     | 674     | 1180     | 674      |

\*p < .05; \*\*p < .01; \*\*\*p < .001; two-tailed tests.

Notes: Models including an interaction for Black \* Tract Disadvantage are two-level linear multilevel models clustering on census tracts, and include a random slope term for Black (vs. white) respondent. All other models are single-level linear regression models with cluster robust standard errors. The following variables are z-score standardized: Tract concentrated disadvantage, tract collective efficacy, non-home collective efficacy, and non-home concentrated disadvantage.



APPENDIX: RACIAL SEGREGATION IN ACTIVITY SPACE

Appendix Table 18. Linear regression models for non-home exposure to collective efficacy based on census tracts with interactions and cluster robust standard errors.

|                                    | Collective Efficacy |                     |                    |                     |                    |                     |                    |
|------------------------------------|---------------------|---------------------|--------------------|---------------------|--------------------|---------------------|--------------------|
|                                    | Model 1             | Model 2             | Model 3            | Model 4             | Model 5            | Model 6             | Model 7            |
| ln(Block group population density) | 0.011<br>(0.032)    | 0.025<br>(0.034)    | -0.059<br>(0.052)  | 0.026<br>(0.034)    | -0.060<br>(0.052)  | 0.027<br>(0.034)    | -0.059<br>(0.052)  |
| Total non-home time (minutes)      | 0.000<br>(0.000)    | 0.000+<br>(0.000)   | 0.000<br>(0.000)   | 0.000+<br>(0.000)   | 0.000<br>(0.000)   | 0.000+<br>(0.000)   | 0.000<br>(0.000)   |
| Season                             |                     |                     |                    |                     |                    |                     |                    |
| Winter (December-February) (ref.)  |                     |                     |                    |                     |                    |                     |                    |
| Spring (March-May)                 | -0.081<br>(0.054)   | -0.064<br>(0.051)   | -0.053<br>(0.061)  | -0.064<br>(0.051)   | -0.054<br>(0.061)  | -0.064<br>(0.051)   | -0.056<br>(0.061)  |
| Summer (June-August)               | -0.120*<br>(0.052)  | -0.098+<br>(0.056)  | -0.167*<br>(0.078) | -0.098+<br>(0.056)  | -0.165*<br>(0.077) | -0.098+<br>(0.056)  | -0.167*<br>(0.077) |
| Autumn (September-November)        | -0.073<br>(0.052)   | -0.051<br>(0.053)   | -0.149*<br>(0.074) | -0.052<br>(0.053)   | -0.151*<br>(0.075) | -0.053<br>(0.053)   | -0.148*<br>(0.074) |
| Number of Weekend Days             |                     |                     |                    |                     |                    |                     |                    |
| 0                                  | 0.001<br>(0.135)    | 0.003<br>(0.168)    | -0.008<br>(0.148)  | 0.004<br>(0.168)    | 0.003<br>(0.147)   | 0.007<br>(0.168)    | -0.015<br>(0.149)  |
| 1                                  | -0.096<br>(0.100)   | -0.060<br>(0.124)   | -0.125<br>(0.115)  | -0.060<br>(0.124)   | -0.127<br>(0.114)  | -0.062<br>(0.123)   | -0.124<br>(0.116)  |
| 2 (ref.)                           |                     |                     |                    |                     |                    |                     |                    |
| Family Controls                    |                     |                     |                    |                     |                    |                     |                    |
| Household size                     | -0.025*<br>(0.012)  | -0.022<br>(0.014)   | -                  | -0.022<br>(0.018)   | 0.056**<br>(0.018) | -0.022<br>(0.015)   | 0.056**<br>(0.018) |
| Parent male                        | 0.045<br>(0.057)    | 0.044<br>(0.052)    | 0.074<br>(0.076)   | 0.043<br>(0.052)    | 0.075<br>(0.075)   | 0.044<br>(0.052)    | 0.074<br>(0.075)   |
| Parent age                         | 0.003<br>(0.003)    | 0.004<br>(0.003)    | 0.005<br>(0.003)   | 0.004<br>(0.003)    | 0.005<br>(0.003)   | 0.003<br>(0.003)    | 0.005<br>(0.003)   |
| Household income                   |                     |                     |                    |                     |                    |                     |                    |
| Under \$30,000 (ref.)              |                     |                     |                    |                     |                    |                     |                    |
| \$30,001 - \$60,000                | 0.048<br>(0.057)    | -0.001<br>(0.064)   | 0.101<br>(0.072)   | -0.003<br>(0.064)   | 0.106<br>(0.071)   | -0.004<br>(0.064)   | 0.103<br>(0.071)   |
| \$60,000 - \$150,000+              | 0.107+<br>(0.063)   | 0.133*<br>(0.065)   | 0.089<br>(0.068)   | 0.133*<br>(0.065)   | 0.094<br>(0.068)   | 0.135*<br>(0.066)   | 0.088<br>(0.068)   |
| Parent education                   |                     |                     |                    |                     |                    |                     |                    |
| <High school (ref.)                |                     |                     |                    |                     |                    |                     |                    |
| High school                        | 0.058<br>(0.093)    | 0.079<br>(0.079)    | 0.087<br>(0.101)   | 0.081<br>(0.080)    | 0.087<br>(0.102)   | 0.081<br>(0.079)    | 0.081<br>(0.101)   |
| Some college                       | 0.126<br>(0.087)    | 0.175*<br>(0.080)   | 0.113<br>(0.108)   | 0.176*<br>(0.080)   | 0.108<br>(0.108)   | 0.176*<br>(0.080)   | 0.108<br>(0.108)   |
| College degree                     | 0.223*<br>(0.099)   | 0.343***<br>(0.101) | 0.127<br>(0.133)   | 0.344***<br>(0.101) | 0.126<br>(0.133)   | 0.345***<br>(0.101) | 0.118<br>(0.134)   |
| Graduate degree                    | 0.144<br>(0.105)    | 0.283**<br>(0.100)  | 0.005<br>(0.124)   | 0.284**<br>(0.100)  | 0.003<br>(0.124)   | 0.284**<br>(0.100)  | 0.001<br>(0.124)   |
| Parent marital status              |                     |                     |                    |                     |                    |                     |                    |
| Married (ref.)                     |                     |                     |                    |                     |                    |                     |                    |
| Cohabiting                         | -0.028<br>(0.071)   | -0.060<br>(0.080)   | -0.060<br>(0.103)  | -0.063<br>(0.079)   | -0.056<br>(0.102)  | -0.066<br>(0.080)   | -0.051<br>(0.105)  |
| Single                             | -0.077<br>(0.063)   | -0.095<br>(0.068)   | -0.053<br>(0.087)  | -0.096<br>(0.069)   | -0.062<br>(0.087)  | -0.099<br>(0.068)   | -0.049<br>(0.086)  |
| Other                              | -0.176**<br>(0.059) | -0.184**<br>(0.066) | -0.199*<br>(0.092) | -0.185**<br>(0.065) | -0.201*<br>(0.091) | -0.187**<br>(0.065) | -0.195*<br>(0.091) |
| Residence owned (vs. rented)       | 0.047<br>(0.055)    | -0.006<br>(0.062)   | 0.027<br>(0.071)   | -0.006<br>(0.062)   | 0.018<br>(0.071)   | -0.008<br>(0.063)   | 0.028<br>(0.070)   |

APPENDIX: RACIAL SEGREGATION IN ACTIVITY SPACE

|                                     |                      |                     |                   |                     |                   |                     |                    |
|-------------------------------------|----------------------|---------------------|-------------------|---------------------|-------------------|---------------------|--------------------|
| Years lived in current neighborhood | -0.001<br>(0.002)    | 0.000<br>(0.002)    | -0.001<br>(0.003) | -0.000<br>(0.002)   | -0.001<br>(0.003) | 0.000<br>(0.002)    | -0.001<br>(0.003)  |
| Moved in the past two years         | -0.078<br>(0.054)    | -0.081<br>(0.057)   | -0.116<br>(0.072) | -0.081<br>(0.057)   | -0.114<br>(0.072) | -0.034<br>(0.097)   | -0.193<br>(0.134)  |
| Foreign born                        | -0.114<br>(0.131)    | -0.051<br>(0.138)   | -0.207<br>(0.168) | -0.054<br>(0.138)   | -0.210<br>(0.168) | -0.058<br>(0.138)   | -0.196<br>(0.167)  |
| Age                                 | 0.009<br>(0.010)     | 0.009<br>(0.011)    | 0.004<br>(0.011)  | 0.010<br>(0.016)    | 0.019<br>(0.015)  | 0.009<br>(0.011)    | 0.003<br>(0.011)   |
| Male                                | 0.073*<br>(0.036)    | 0.051<br>(0.059)    | 0.062<br>(0.079)  | 0.082*<br>(0.040)   | 0.064<br>(0.050)  | 0.082*<br>(0.040)   | 0.064<br>(0.050)   |
| Respondent Black (vs. white)        | -0.218***<br>(0.055) | -0.217**<br>(0.071) | -0.135<br>(0.083) | -0.155<br>(0.316)   | 0.298<br>(0.361)  | -0.174**<br>(0.066) | -0.158*<br>(0.072) |
| Neighborhood-level measures         |                      |                     |                   |                     |                   |                     |                    |
| Tract concentrated disadvantage     | -0.250***<br>(0.063) | -0.065<br>(0.044)   |                   | -0.066<br>(0.044)   |                   | -0.067<br>(0.045)   | -0.158*<br>(0.072) |
| Tract proportion Black              |                      |                     |                   |                     |                   |                     |                    |
| Tract collective efficacy           | 0.440***<br>(0.050)  | 0.498***<br>(0.050) |                   | 0.497***<br>(0.051) |                   | 0.497***<br>(0.051) |                    |
| ln(Tract Violent crime rate)        |                      |                     |                   |                     |                   |                     |                    |
| Interaction terms                   |                      |                     |                   |                     |                   |                     |                    |
| Black * Tract Disadvantage          | 0.199***<br>(0.058)  |                     |                   |                     |                   |                     |                    |
| Black * Male                        |                      | 0.063<br>(0.077)    | 0.001<br>(0.102)  |                     |                   |                     |                    |
| Black * Age                         |                      |                     |                   | -0.002<br>(0.021)   | -0.030<br>(0.025) |                     |                    |
| Black * Moved                       |                      |                     |                   |                     |                   | -0.073<br>(0.120)   | 0.124<br>(0.152)   |
| Constant                            | -0.317<br>(0.342)    | -0.522<br>(0.337)   | 0.306<br>(0.507)  | -0.562<br>(0.373)   | 0.105<br>(0.532)  | -0.560+<br>(0.335)  | 0.320<br>(0.499)   |
| N: Neighborhood-level               | 178                  | 178                 | 89                | 178                 | 89                | 178                 | 89                 |
| N: Individual-level                 | 1180                 | 1180                | 674               | 1180                | 674               | 1180                | 674                |

\*p < .05; \*\*p < .01; \*\*\*p < .001; two-tailed tests.

Notes: Models including an interaction for Black \* Tract Disadvantage are two-level linear multilevel models clustering on census tracts, and include a random slope term for Black (vs. white) respondent. All other models are single-level linear regression models with cluster robust standard errors. The following variables are z-score standardized: Tract concentrated disadvantage, tract collective efficacy, non-home collective efficacy, and non-home concentrated disadvantage.

## Full Tables for Non-home Collective Efficacy Models Presented in Tables 2 and 3: Measuring Collective Efficacy with Only Home Neighborhood Reports

Appendix Table 19. Linear regression models for non-home collective efficacy, measuring collective efficacy with home neighborhood reports.

|                                    | Model 1            | Model 2             | Model 3            | Model 4             | Model 5            | Model 6            | Model 7            |
|------------------------------------|--------------------|---------------------|--------------------|---------------------|--------------------|--------------------|--------------------|
| ln(Block group population density) | 0.029<br>(0.047)   | 0.113<br>(0.069)    | 0.002<br>(0.069)   | -0.001<br>(0.036)   | 0.028<br>(0.047)   | 0.029<br>(0.047)   | 0.032<br>(0.047)   |
| Total non-home time (minutes)      | 0.000+<br>(0.000)  | 0.000<br>(0.000)    | 0.000<br>(0.000)   | 0.000<br>(0.000)    | 0.000+<br>(0.000)  | 0.000+<br>(0.000)  | 0.000+<br>(0.000)  |
| Season                             |                    |                     |                    |                     |                    |                    |                    |
| Winter (December-February) (ref.)  |                    |                     |                    |                     |                    |                    |                    |
| Spring (March-May)                 | -0.090<br>(0.056)  | -0.083<br>(0.079)   | -0.097<br>(0.070)  | -0.104+<br>(0.060)  | -0.090<br>(0.056)  | -0.091<br>(0.056)  | -0.091<br>(0.056)  |
| Summer (June-August)               | -0.135*<br>(0.065) | -0.170+<br>(0.089)  | -0.228*<br>(0.089) | -0.158**<br>(0.057) | -0.134*<br>(0.065) | -0.136*<br>(0.066) | -0.135*<br>(0.065) |
| Autumn (September-November)        | -0.050<br>(0.064)  | -0.075<br>(0.082)   | -0.118<br>(0.087)  | -0.066<br>(0.058)   | -0.049<br>(0.064)  | -0.049<br>(0.064)  | -0.053<br>(0.063)  |
| Number of Weekend Days             |                    |                     |                    |                     |                    |                    |                    |
| 0                                  | 0.032<br>(0.201)   | -0.082<br>(0.214)   | 0.033<br>(0.137)   | 0.052<br>(0.149)    | 0.031<br>(0.201)   | 0.026<br>(0.200)   | 0.040<br>(0.202)   |
| 1                                  | 0.000<br>(0.116)   | 0.033<br>(0.126)    | -0.017<br>(0.107)  | -0.043<br>(0.111)   | 0.000<br>(0.116)   | 0.009<br>(0.117)   | -0.004<br>(0.114)  |
| 2 (ref.)                           |                    |                     |                    |                     |                    |                    |                    |
| Family Controls                    |                    |                     |                    |                     |                    |                    |                    |
| Household size                     | -0.026+<br>(0.015) | -0.052**<br>(0.019) | -0.046*<br>(0.019) | -0.026+<br>(0.014)  | -0.026+<br>(0.015) | -0.026+<br>(0.015) | -0.025+<br>(0.015) |
| Parent male                        | 0.040<br>(0.062)   | 0.087<br>(0.079)    | 0.085<br>(0.082)   | 0.036<br>(0.063)    | 0.040<br>(0.062)   | 0.037<br>(0.061)   | 0.041<br>(0.062)   |
| Parent age                         | 0.003<br>(0.003)   | 0.005<br>(0.004)    | 0.004<br>(0.004)   | 0.003<br>(0.003)    | 0.003<br>(0.003)   | 0.003<br>(0.003)   | 0.003<br>(0.003)   |
| Household income                   |                    |                     |                    |                     |                    |                    |                    |
| Under \$30,000 (ref.)              |                    |                     |                    |                     |                    |                    |                    |
| \$30,001 - \$60,000                | 0.019<br>(0.066)   | 0.057<br>(0.073)    | 0.073<br>(0.070)   | 0.057<br>(0.062)    | 0.022<br>(0.066)   | 0.010<br>(0.066)   | 0.018<br>(0.065)   |
| \$60,000 - \$150,000+              | 0.131*<br>(0.065)  | 0.120<br>(0.077)    | 0.040<br>(0.075)   | 0.096<br>(0.070)    | 0.131*<br>(0.065)  | 0.127+<br>(0.065)  | 0.135*<br>(0.065)  |
| Parent education                   |                    |                     |                    |                     |                    |                    |                    |
| <High school (ref.)                |                    |                     |                    |                     |                    |                    |                    |
| High school                        | 0.006<br>(0.093)   | -0.121<br>(0.115)   | -0.122<br>(0.113)  | 0.002<br>(0.103)    | 0.004<br>(0.093)   | -0.001<br>(0.093)  | 0.005<br>(0.093)   |
| Some college                       | 0.104<br>(0.093)   | 0.038<br>(0.117)    | -0.046<br>(0.117)  | 0.070<br>(0.097)    | 0.103<br>(0.093)   | 0.104<br>(0.093)   | 0.105<br>(0.093)   |
| College degree                     | 0.274*<br>(0.123)  | 0.138<br>(0.158)    | -0.065<br>(0.146)  | 0.159<br>(0.110)    | 0.273*<br>(0.123)  | 0.270*<br>(0.123)  | 0.276*<br>(0.123)  |
| Graduate degree                    | 0.282*<br>(0.122)  | 0.142<br>(0.156)    | -0.101<br>(0.143)  | 0.117<br>(0.116)    | 0.281*<br>(0.122)  | 0.280*<br>(0.121)  | 0.282*<br>(0.122)  |
| Parent marital status              |                    |                     |                    |                     |                    |                    |                    |
| Married (ref.)                     |                    |                     |                    |                     |                    |                    |                    |
| Cohabiting                         | -0.020<br>(0.099)  | -0.069<br>(0.116)   | -0.101<br>(0.112)  | -0.023<br>(0.079)   | -0.016<br>(0.099)  | -0.027<br>(0.098)  | -0.027<br>(0.099)  |
| Single                             | -0.053<br>(0.076)  | -0.120<br>(0.103)   | -0.083<br>(0.101)  | -0.059<br>(0.069)   | -0.051<br>(0.076)  | -0.045<br>(0.075)  | -0.059<br>(0.076)  |
| Other                              | -0.172**           | -0.218*             | -0.214*            | -0.188**            | -0.172**           | -0.175**           | -0.177**           |

APPENDIX: RACIAL SEGREGATION IN ACTIVITY SPACE

|                                     |           |           |          |           |           |           |          |
|-------------------------------------|-----------|-----------|----------|-----------|-----------|-----------|----------|
|                                     | (0.064)   | (0.083)   | (0.088)  | (0.065)   | (0.065)   | (0.064)   | (0.065)  |
| Residence owned (vs. rented)        | -0.026    | -0.081    | -0.045   | 0.010     | -0.026    | -0.022    | -0.031   |
|                                     | (0.061)   | (0.074)   | (0.067)  | (0.061)   | (0.061)   | (0.060)   | (0.060)  |
| Years lived in current neighborhood | 0.001     | 0.002     | -0.000   | -0.000    | 0.001     | 0.001     | 0.001    |
|                                     | (0.002)   | (0.004)   | (0.003)  | (0.002)   | (0.002)   | (0.002)   | (0.002)  |
| Moved in the past two years         | -0.035    | -0.037    | -0.072   | -0.049    | -0.036    | -0.035    | 0.083    |
|                                     | (0.063)   | (0.078)   | (0.078)  | (0.060)   | (0.062)   | (0.062)   | (0.100)  |
| Foreign born                        | -0.007    | 0.049     | -0.163   | -0.065    | -0.004    | 0.007     | -0.017   |
|                                     | (0.119)   | (0.205)   | (0.144)  | (0.145)   | (0.119)   | (0.118)   | (0.117)  |
| Age                                 | -0.012    | -0.029*   | -0.011   | -0.009    | -0.012    | -0.036*   | -0.011   |
|                                     | (0.013)   | (0.014)   | (0.012)  | (0.011)   | (0.013)   | (0.016)   | (0.013)  |
| Male                                | 0.102*    | 0.135*    | 0.124*   | 0.100*    | 0.068     | 0.102*    | 0.102*   |
|                                     | (0.041)   | (0.061)   | (0.057)  | (0.040)   | (0.060)   | (0.041)   | (0.041)  |
|                                     |           |           |          |           |           |           | -        |
| Respondent Black (vs. white)        | -0.339*** | -0.332*** | -0.228** | -0.304*** | -0.372*** | -1.055**  | 0.307*** |
|                                     | (0.062)   | (0.073)   | (0.072)  | (0.061)   | (0.075)   | (0.316)   | (0.068)  |
| Neighborhood-level measures         |           |           |          |           |           |           | -        |
|                                     |           |           |          |           |           |           | -        |
| Tract concentrated disadvantage     | -0.174*** | -0.242*   |          | -0.274*** | -0.173*** | -0.173*** | 0.176*** |
|                                     | (0.044)   | (0.105)   |          | (0.067)   | (0.043)   | (0.043)   | (0.044)  |
| Tract collective efficacy           | 0.286***  | 0.230*    |          | 0.232***  | 0.286***  | 0.288***  | 0.286*** |
|                                     | (0.059)   | (0.113)   |          | (0.051)   | (0.059)   | (0.059)   | (0.059)  |
| Interaction terms                   |           |           |          |           |           |           |          |
| Black * Tract Disadvantage          |           |           |          | 0.097     |           |           |          |
|                                     |           |           |          | (0.064)   |           |           |          |
| Black * Male                        |           |           |          |           | 0.069     |           |          |
|                                     |           |           |          |           | (0.077)   |           |          |
| Black * Age                         |           |           |          |           |           | 0.050*    |          |
|                                     |           |           |          |           |           | (0.021)   |          |
| Black * Moved                       |           |           |          |           |           |           | -0.185   |
|                                     |           |           |          |           |           |           | (0.122)  |
| Constant                            | -0.103    | -0.441    | 0.266    | 0.164     | -0.077    | 0.244     | -0.138   |
|                                     | (0.456)   | (0.651)   | (0.653)  | (0.380)   | (0.458)   | (0.487)   | (0.457)  |
| Fixed Effects                       |           |           | ✓        |           |           |           |          |
| N: Neighborhood-level               | 178       | 89        | 89       | 178       | 178       | 178       | 178      |
| N: Individual-level                 | 1180      | 674       | 674      | 1180      | 1180      | 1180      | 1180     |

\*p < .05; \*\*p < .01; \*\*\*p < .001; two-tailed tests.

Notes: Models including an interaction for Black \* Tract Disadvantage are two-level linear multilevel models clustering on census tracts, and include a random slope term for Black (vs. white) respondent. All other models are single-level linear regression models with cluster robust standard errors. The following variables are z-score standardized: Tract concentrated disadvantage, tract collective efficacy, non-home collective efficacy, and non-home concentrated disadvantage.
